# Supplementary material
Source: PubMed Central journal article supplement (PMC10101761)
Supplement: NIHMS1880591-supplement-Supplementary.pdf [file NIHMS1880591-supplement-Supplementary.pdf]

Supplementary Table 1

| Gene    | Position change | padj       | Chr   | Start     | End       | Strand | Peak Score | Distance to TSS | Nearest PromoterID | Entrez ID | Gene Alias  | Gene Type      |
|---------|-----------------|------------|-------|-----------|-----------|--------|------------|-----------------|--------------------|-----------|-------------|----------------|
| ABCA8   | 1.21330564      | 3.5841E-05 | chr17 | 68981014  | 68981663  | +      | 236        | -25912          | XM_005256940.4     | 10351     | -           | protein-coding |
| ABCC3   | 2.38781282      | 1.36E-21   | chr17 | 50639207  | 50639709  | +      | 106        | 4601            | NM_003786.3        | 8714      | ABC31 EST9  | protein-coding |
| ABTB1   | 0.56203308      | 0.04233669 | chr3  | 127696346 | 127696505 | +      | 48         | 23119           | XM_011513213.1     | 80325     | BPOZ BTB3   | protein-coding |
| ACSF2   | 0.58790084      | 0.04753648 | chr17 | 50421541  | 50422022  | +      | 57         | -4377           | NM_025149.5        | 80221     | ACSMW AV    | protein-coding |
| ACTA2   | 2.46047804      | 1.5937E-29 | chr10 | 89086735  | 89087739  | +      | 278        | -95840          | NM_001141945.2     | 59        | ACTSA       | protein-coding |
| ACTA2   | 2.46047804      | 1.5937E-29 | chr10 | 88932701  | 88932964  | +      | 108        | 19991           | NM_001613.2        | 59        | ACTSA       | protein-coding |
| ACTA2   | 2.46047804      | 1.5937E-29 | chr10 | 88951559  | 88952032  | +      | 69         | 1028            | NM_001613.2        | 59        | ACTSA       | protein-coding |
| ACTA2   | 2.46047804      | 1.5937E-29 | chr10 | 88935324  | 88935660  | +      | 66         | 17331           | NM_001613.2        | 59        | ACTSA       | protein-coding |
| ACTA2   | 2.46047804      | 1.5937E-29 | chr10 | 88934905  | 88935213  | +      | 53         | 17764           | NM_001613.2        | 59        | ACTSA       | protein-coding |
| ACTN2   | 1.25284256      | 1.0556E-09 | chr1  | 236654565 | 236655212 | +      | 499        | -31566          | NM_001278343.1     | 88        | CMD1AA Cv   | protein-coding |
| ACTN2   | 1.25284256      | 1.0556E-09 | chr1  | 236668998 | 236669184 | +      | 106        | -17363          | NM_001278343.1     | 88        | CMD1AA Cv   | protein-coding |
| ADCY4   | 0.88114877      | 0.00327479 | chr14 | 24334115  | 24334320  | +      | 57         | 854             | NM_001198568.1     | 196883    | AC4         | protein-coding |
| ADGRA1  | 3.51298986      | 9.9394E-74 | chr10 | 133092627 | 133092935 | +      | 48         | 4068            | XM_017016779.1     | 84435     | GPR123      | protein-coding |
| ADGRA2  | 0.62163926      | 0.02474505 | chr8  | 37821587  | 37821929  | +      | 86         | 24875           | XM_011544483.2     | 25960     | GPR124 TEH  | protein-coding |
| ADGRA2  | 0.62163926      | 0.02474505 | chr8  | 37781328  | 37781877  | +      | 86         | -15281          | XM_011544482.2     | 25960     | GPR124 TEH  | protein-coding |
| ADGRA2  | 0.62163926      | 0.02474505 | chr8  | 37822331  | 37822771  | +      | 66         | 25668           | XM_011544483.2     | 25960     | GPR124 TEH  | protein-coding |
| ADGRB3  | 0.82645476      | 0.00042845 | chr6  | 68640169  | 68640456  | +      | 53         | 4572            | NM_001704.2        | 577       | BAI3        | protein-coding |
| ADGRB3  | 0.82645476      | 0.00042845 | chr6  | 68668006  | 68668433  | +      | 49         | 32479           | NM_001704.2        | 577       | BAI3        | protein-coding |
| ADORA1  | 0.69396335      | 0.02079871 | chr1  | 203153704 | 203153902 | +      | 53         | 24889           | XM_005244902.4     | 134       | RDC7        | protein-coding |
| AHSG    | 1.24339045      | 1.0133E-08 | chr3  | 186613870 | 186614116 | +      | 48         | 932             | NM_001622.2        | 197       | A2HS AHS A  | protein-coding |
| AHSG    | 1.24339045      | 1.0133E-08 | chr3  | 186614964 | 186615198 | +      | 48         | 2020            | NM_001622.2        | 197       | A2HS AHS A  | protein-coding |
| AKAP12  | 1.41459856      | 4.46E-09   | chr6  | 151224886 | 151225186 | +      | 14         | -14779          | XM_017011517.1     | 9590      | AKAP250 SS  | protein-coding |
| ALCAM   | 0.59826926      | 0.01464304 | chr3  | 105494333 | 105494484 | +      | 45         | 127695          | NM_001243280.1     | 214       | CD166 MEM   | protein-coding |
| ALCAM   | 0.59826926      | 0.01464304 | chr3  | 105366721 | 105366872 | +      | 31         | 83              | NM_001243280.1     | 214       | CD166 MEM   | protein-coding |
| ALCAM   | 0.59826926      | 0.01464304 | chr3  | 103906828 | 103907108 | +      | 19         | -1459745        | NM_001243283.1     | 214       | CD166 MEM   | protein-coding |
| AMACR   | 0.553268        | 0.01365082 | chr5  | 34241572  | 34242148  | +      | 369        | -233745         | NM_203382.2        | 23600     | AMACRD CB   | protein-coding |
| AMACR   | 0.553268        | 0.01365082 | chr5  | 34240616  | 34241154  | +      | 139        | -232770         | NM_203382.2        | 23600     | AMACRD CB   | protein-coding |
| AMACR   | 0.553268        | 0.01365082 | chr5  | 34256385  | 34256708  | +      | 40         | -248431         | NM_203382.2        | 23600     | AMACRD CB   | protein-coding |
| AMACR   | 0.553268        | 0.01365082 | chr5  | 34244245  | 34244751  | +      | 37         | -236383         | NM_203382.2        | 23600     | AMACRD CB   | protein-coding |
| AMOT    | 1.60023777      | 7.4138E-10 | chrX  | 112943938 | 112944111 | +      | 117        | -103078         | XM_011530875.2     | 154796    | -           | protein-coding |
| ANGPTL4 | 0.70776837      | 0.01628274 | chr19 | 8363480   | 8363685   | +      | 31         | -545            | NM_001039667.2     | 51129     | ARP4 FIAF I | protein-coding |
| ANK3    | 0.81458578      | 0.00560589 | chr10 | 60314217  | 60314736  | +      | 452        | -13936          | XM_017016115.1     | 288       | ANKYRIN-G   | protein-coding |
| ANK3    | 0.81458578      | 0.00560589 | chr10 | 60704439  | 60704871  | +      | 222        | 28871           | NM_001204403.1     | 288       | ANKYRIN-G   | protein-coding |
| ANK3    | 0.81458578      | 0.00560589 | chr10 | 60029423  | 60029967  | +      | 206        | 111321          | NM_001149.3        | 288       | ANKYRIN-G   | protein-coding |
| ANK3    | 0.81458578      | 0.00560589 | chr10 | 60446932  | 60447107  | +      | 86         | -57035          | NM_020987.4        | 288       | ANKYRIN-G   | protein-coding |
| ANKRD24 | 0.91637137      | 0.00131985 | chr19 | 4193847   | 4194118   | +      | 117        | -4455           | XM_011527765.2     | 170961    | -           | protein-coding |
| ANKRD24 | 0.91637137      | 0.00131985 | chr19 | 4186521   | 4186672   | +      | 23         | 2362            | XM_017026438.1     | 170961    | -           | protein-coding |
| ANKRD29 | 0.93182475      | 0.00150978 | chr18 | 23668710  | 23669637  | +      | 369        | -6266           | XM_017025561.1     | 147463    | -           | protein-coding |
| ANKRD29 | 0.93182475      | 0.00150978 | chr18 | 23671563  | 23671949  | +      | 106        | -8849           | XM_017025561.1     | 147463    | -           | protein-coding |
| ANKRD6  | 0.62641313      | 0.0102892  | chr6  | 89436257  | 89436477  | +      | 25         | 3145            | XM_017010510.1     | 22881     | -           | protein-coding |
| ANTXR2  | 0.62120943      | 0.03065741 | chr4  | 80006922  | 80007208  | +      | 57         | 66258           | NM_001145794.1     | 118429    | CMG-2 CMG   | protein-coding |
| ANXA2R  | 0.55370487      | 0.04832466 | chr5  | 43039508  | 43041124  | +      | 1202       | 29              | NM_001014279.2     | 389289    | AX2R AXIIR  | protein-coding |
| ANXA2R  | 0.55370487      | 0.04832466 | chr5  | 42994484  | 42995432  | +      | 682        | 45387           | NM_001014279.2     | 389289    | AX2R AXIIR  | protein-coding |
| ANXA2R  | 0.55370487      | 0.04832466 | chr5  | 43064756  | 43065286  | +      | 383        | -24676          | NM_001014279.2     | 389289    | AX2R AXIIR  | protein-coding |
| ANXA2R  | 0.55370487      | 0.04832466 | chr5  | 43063082  | 43063628  | +      | 341        | -23010          | NM_001014279.2     | 389289    | AX2R AXIIR  | protein-coding |
| ANXA2R  | 0.55370487      | 0.04832466 | chr5  | 43008027  | 43008961  | +      | 236        | 31851           | NM_001014279.2     | 389289    | AX2R AXIIR  | protein-coding |
| ANXA2R  | 0.55370487      | 0.04832466 | chr5  | 42950456  | 42950957  | +      | 186        | 89639           | NM_001014279.2     | 389289    | AX2R AXIIR  | protein-coding |
| ANXA2R  | 0.55370487      | 0.04832466 | chr5  | 42970715  | 42970967  | +      | 179        | 69504           | NM_001014279.2     | 389289    | AX2R AXIIR  | protein-coding |
| ANXA2R  | 0.55370487      | 0.04832466 | chr5  | 42949371  | 42950144  | +      | 128        | 90588           | NM_001014279.2     | 389289    | AX2R AXIIR  | protein-coding |
| ANXA2R  | 0.55370487      | 0.04832466 | chr5  | 43066800  | 43067111  | +      | 106        | -26610          | NM_001014279.2     | 389289    | AX2R AXIIR  | protein-coding |
| ANXA2R  | 0.55370487      | 0.04832466 | chr5  | 43019712  | 43020426  | +      | 86         | 20276           | NM_001014279.2     | 389289    | AX2R AXIIR  | protein-coding |
| ANXA2R  | 0.55370487      | 0.04832466 | chr5  | 42992858  | 42994214  | +      | 86         | 46809           | NM_001014279.2     | 389289    | AX2R AXIIR  | protein-coding |
| ANXA2R  | 0.55370487      | 0.04832466 | chr5  | 43042469  | 43043479  | +      | 66         | -2629           | NM_001014279.2     | 389289    | AX2R AXIIR  | protein-coding |
| ANXA2R  | 0.55370487      | 0.04832466 | chr5  | 43066032  | 43066321  | +      | 57         | -25831          | NM_001014279.2     | 389289    | AX2R AXIIR  | protein-coding |
| ANXA2R  | 0.55370487      | 0.04832466 | chr5  | 43019089  | 43019325  | +      | 45         | 21138           | NM_001014279.2     | 389289    | AX2R AXIIR  | protein-coding |
| ANXA2R  | 0.55370487      | 0.04832466 | chr5  | 43017949  | 43018100  | +      | 39         | 22321           | NM_001014279.2     | 389289    | AX2R AXIIR  | protein-coding |
| ANXA2R  | 0.55370487      | 0.04832466 | chr5  | 43041549  | 43042080  | +      | 39         | -1469           | NM_001014279.2     | 389289    | AX2R AXIIR  | protein-coding |
| ANXA2R  | 0.55370487      | 0.04832466 | chr5  | 42951625  | 42951798  | +      | 23         | 88634           | NM_001014279.2     | 389289    | AX2R AXIIR  | protein-coding |
| APCDD1  | 0.72589998      | 2.1165E-06 | chr18 | 10461667  | 10463813  | +      | 2209       | 8105            | XM_011525603.1     | 147495    | B7323 DRAF  | protein-coding |
| APCDD1  | 0.72589998      | 2.1165E-06 | chr18 | 10476377  | 10477899  | +      | 442        | 22503           | XM_011525603.1     | 147495    | B7323 DRAF  | protein-coding |
| APCDD1  | 0.72589998      | 2.1165E-06 | chr18 | 10440840  | 10441311  | +      | 321        | -13553          | NM_153000.4        | 147495    | B7323 DRAF  | protein-coding |
| APCDD1  | 0.72589998      | 2.1165E-06 | chr18 | 10472549  | 10473135  | +      | 236        | 18207           | XM_011525603.1     | 147495    | B7323 DRAF  | protein-coding |
| APCDD1  | 0.72589998      | 2.1165E-06 | chr18 | 10405080  | 10405660  | +      | 229        | -49258          | NM_153000.4        | 147495    | B7323 DRAF  | protein-coding |
| APCDD1  | 0.72589998      | 2.1165E-06 | chr18 | 10460380  | 10460901  | +      | 77         | 6005            | XM_011525603.1     | 147495    | B7323 DRAF  | protein-coding |
| APCDD1  | 0.72589998      | 2.1165E-06 | chr18 | 10304946  | 10305194  | +      | 66         | -149558         | NM_153000.4        | 147495    | B7323 DRAF  | protein-coding |
| APCDD1  | 0.72589998      | 2.1165E-06 | chr18 | 10213625  | 10213801  | +      | 55         | -240915         | NM_153000.4        | 147495    | B7323 DRAF  | protein-coding |
| APCDD1  | 0.72589998      | 2.1165E-06 | chr18 | 10466440  | 10466642  | +      | 48         | 11906           | XM_011525603.1     | 147495    | B7323 DRAF  | protein-coding |
| APCDD1  | 0.72589998      | 2.1165E-06 | chr18 | 10454221  | 10454410  | +      | 42         | -313            | NM_153000.4        | 147495    | B7323 DRAF  | protein-coding |
| APCDD1  | 0.72589998      | 2.1165E-06 | chr18 | 10285266  | 10285593  | +      | 30         | -169199         | NM_153000.4        | 147495    | B7323 DRAF  | protein-coding |
| APOH    | 0.69716067      | 0.01872752 | chr17 | 66221034  | 66221690  | +      | 422        | 8076            | NM_000042.2        | 350       | B2G1 B2GP   | protein-coding |
| APOH    | 0.69716067      | 0.01872752 | chr17 | 66233431  | 66233692  | +      | 134        | -4123           | NM_000042.2        | 350       | B2G1 B2GP   | protein-coding |
| APOL4   | 1.11903233      | 7.1361E-05 | chr22 | 36126417  | 36126739  | +      | 172        | 78255           | NM_145660.2        | 80832     | APOL-IV APC | protein-coding |

|          |            |            |       |           |             |      |         |                |        |              |                |
|----------|------------|------------|-------|-----------|-------------|------|---------|----------------|--------|--------------|----------------|
| APOL4    | 1.11903233 | 7.1361E-05 | chr22 | 36066014  | 36066389 +  | 39   | 138632  | NM_145660.2    | 80832  | APOL-IV APC  | protein-coding |
| APOL4    | 1.11903233 | 7.1361E-05 | chr22 | 35971772  | 35971949 +  | 36   | 232973  | NM_145660.2    | 80832  | APOL-IV APC  | protein-coding |
| APOL4    | 1.11903233 | 7.1361E-05 | chr22 | 36123923  | 36124232 +  | 25   | 80756   | NM_145660.2    | 80832  | APOL-IV APC  | protein-coding |
| ARHGAP31 | 0.5633846  | 0.01005188 | chr3  | 119294157 | 119294398 + | 57   | -12     | XM_017006955.1 | 57514  | AOS1 CDGA    | protein-coding |
| ARHGEF17 | 0.64477953 | 0.00305667 | chr11 | 73307231  | 73307519 +  | 39   | -1243   | NM_014786.3    | 9828   | P164RHOGEL   | protein-coding |
| ARHGEF17 | 0.64477953 | 0.00305667 | chr11 | 73307994  | 73308149 +  | 31   | -547    | NM_014786.3    | 9828   | P164RHOGEL   | protein-coding |
| ARHGEF37 | 0.82785381 | 0.00740221 | chr5  | 149559756 | 149560075 + | 94   | 7866    | XM_011537642.2 | 389337 | -            | protein-coding |
| ARHGEF37 | 0.82785381 | 0.00740221 | chr5  | 149561811 | 149562158 + | 57   | 9935    | XM_011537642.2 | 389337 | -            | protein-coding |
| ARHGEF5  | 0.87993934 | 0.00208681 | chr7  | 144195040 | 144195559 + | 844  | -160042 | XM_017012623.1 | 7984   | GEF5 P60 T   | protein-coding |
| ARHGEF5  | 0.87993934 | 0.00208681 | chr7  | 144293620 | 144294168 + | 748  | -61447  | XM_017012623.1 | 7984   | GEF5 P60 T   | protein-coding |
| ARHGEF5  | 0.87993934 | 0.00208681 | chr7  | 144355273 | 144355916 + | 534  | 198     | NM_005435.3    | 7984   | GEF5 P60 T   | protein-coding |
| ARHGEF5  | 0.87993934 | 0.00208681 | chr7  | 145909885 | 145910300 + | 109  | 1554696 | NM_005435.3    | 7984   | GEF5 P60 T   | protein-coding |
| ARHGEF5  | 0.87993934 | 0.00208681 | chr7  | 144256109 | 144256385 + | 102  | -99094  | XM_017012623.1 | 7984   | GEF5 P60 T   | protein-coding |
| ARHGEF5  | 0.87993934 | 0.00208681 | chr7  | 144354712 | 144354907 + | 53   | -532    | XM_017012623.1 | 7984   | GEF5 P60 T   | protein-coding |
| ARHGEF6  | 1.7878102  | 7.5066E-11 | chrX  | 136735679 | 136736108 + | 287  | 23724   | XM_011531415.2 | 9459   | COOL2 Cool   | protein-coding |
| ARL4C    | 0.67561795 | 0.01849582 | chr2  | 234544613 | 234544873 + | 128  | -47690  | NM_001282431.1 | 10123  | ARL7 LAK     | protein-coding |
| ARL4C    | 0.67561795 | 0.01849582 | chr2  | 234619920 | 234620308 + | 111  | -123061 | NM_001282431.1 | 10123  | ARL7 LAK     | protein-coding |
| ARRB1    | 0.66859453 | 0.00548778 | chr11 | 75340675  | 75340910 +  | 39   | 10879   | XM_017017752.1 | 408    | ARB1 ARR1    | protein-coding |
| ARSD     | 1.53901125 | 5.1367E-10 | chrX  | 3142597   | 3143647 +   | 287  | -213747 | NM_009589.3    | 414    | ASD          | protein-coding |
| ARSD     | 1.53901125 | 5.1367E-10 | chrX  | 2894938   | 2895265 +   | 129  | 34244   | XM_005274514.2 | 414    | ASD          | protein-coding |
| ARSG     | 0.66047435 | 0.02322558 | chr17 | 68346468  | 68346668 +  | 23   | -10243  | XM_011524546.2 | 22901  | USH4         | protein-coding |
| AZIN2    | 0.53812408 | 0.0426751  | chr1  | 33127055  | 33127582 +  | 139  | 45048   | XM_017000178.1 | 113451 | ADC AZI2 A   | protein-coding |
| BCAS1    | 1.04962826 | 5.3092E-06 | chr20 | 53960132  | 53961252 +  | 2001 | 98323   | XM_011529090.2 | 8537   | AIBC1 NABC   | protein-coding |
| BCAS1    | 1.04962826 | 5.3092E-06 | chr20 | 53837641  | 53838053 +  | 248  | 221168  | XM_011529090.2 | 8537   | AIBC1 NABC   | protein-coding |
| BCAS1    | 1.04962826 | 5.3092E-06 | chr20 | 53940005  | 53940377 +  | 92   | 118824  | XM_011529090.2 | 8537   | AIBC1 NABC   | protein-coding |
| BCAS1    | 1.04962826 | 5.3092E-06 | chr20 | 54015574  | 54015768 +  | 76   | 43344   | XM_011529090.2 | 8537   | AIBC1 NABC   | protein-coding |
| BCAS1    | 1.04962826 | 5.3092E-06 | chr20 | 53872624  | 53872811 +  | 66   | 186298  | XM_011529090.2 | 8537   | AIBC1 NABC   | protein-coding |
| BCAS1    | 1.04962826 | 5.3092E-06 | chr20 | 53853655  | 53853812 +  | 66   | 205282  | XM_011529090.2 | 8537   | AIBC1 NABC   | protein-coding |
| BCAS1    | 1.04962826 | 5.3092E-06 | chr20 | 53915734  | 53915962 +  | 48   | 143167  | XM_011529090.2 | 8537   | AIBC1 NABC   | protein-coding |
| BCAS1    | 1.04962826 | 5.3092E-06 | chr20 | 53934641  | 53935045 +  | 32   | 124172  | XM_011529090.2 | 8537   | AIBC1 NABC   | protein-coding |
| BCAS1    | 1.04962826 | 5.3092E-06 | chr20 | 53899606  | 53899826 +  | 31   | 159299  | XM_011529090.2 | 8537   | AIBC1 NABC   | protein-coding |
| BCAS1    | 1.04962826 | 5.3092E-06 | chr20 | 54078356  | 54078624 +  | 31   | -7725   | NM_003657.3    | 8537   | AIBC1 NABC   | protein-coding |
| BCAS1    | 1.04962826 | 5.3092E-06 | chr20 | 53917354  | 53917620 +  | 19   | 141528  | XM_011529090.2 | 8537   | AIBC1 NABC   | protein-coding |
| BCHE     | 0.70004849 | 0.0003884  | chr3  | 165796813 | 165797540 + | 206  | 40289   | NM_000055.2    | 590    | BCHED CHE1   | protein-coding |
| BCHE     | 0.70004849 | 0.0003884  | chr3  | 165643108 | 165643326 + | 62   | 194248  | NM_000055.2    | 590    | BCHED CHE1   | protein-coding |
| BEGAIN   | 1.56891822 | 5.4314E-09 | chr14 | 100689557 | 100690039 + | 151  | -102394 | XM_011537031.1 | 57596  | -            | protein-coding |
| BEGAIN   | 1.56891822 | 5.4314E-09 | chr14 | 100990888 | 100991039 + | 70   | -403559 | XM_011537031.1 | 57596  | -            | protein-coding |
| BFSP1    | 0.63063079 | 0.00238142 | chr20 | 17391709  | 17392362 +  | 779  | 139334  | NM_001195.4    | 631    | CP115 CP94   | protein-coding |
| BFSP1    | 0.63063079 | 0.00238142 | chr20 | 17520560  | 17520964 +  | 218  | 10607   | NM_001195.4    | 631    | CP115 CP94   | protein-coding |
| BMP7     | 1.35888338 | 6.4313E-09 | chr20 | 56957511  | 56957718 +  | 31   | 309037  | NM_001719.2    | 655    | OP-1         | protein-coding |
| BOK      | 0.75655322 | 0.00882652 | chr2  | 241572782 | 241573000 + | 45   | 13869   | XM_011511696.2 | 666    | BCL2L9 BOK   | protein-coding |
| BRINP2   | 1.60127259 | 3.959E-08  | chr1  | 177561260 | 177561711 + | 309  | 305159  | XM_011509826.1 | 57795  | DBCCR1L2 F   | protein-coding |
| BRINP2   | 1.60127259 | 3.959E-08  | chr1  | 177287069 | 177287279 + | 96   | 30848   | XM_011509826.1 | 57795  | DBCCR1L2 F   | protein-coding |
| BRINP2   | 1.60127259 | 3.959E-08  | chr1  | 177080576 | 177080864 + | 76   | -90202  | XM_005245379.1 | 57795  | DBCCR1L2 F   | protein-coding |
| BRINP2   | 1.60127259 | 3.959E-08  | chr1  | 176904384 | 176904558 + | 57   | -266451 | XM_005245379.1 | 57795  | DBCCR1L2 F   | protein-coding |
| BRINP2   | 1.60127259 | 3.959E-08  | chr1  | 176990437 | 176990673 + | 46   | -180367 | XM_005245379.1 | 57795  | DBCCR1L2 F   | protein-coding |
| BRINP2   | 1.60127259 | 3.959E-08  | chr1  | 177462660 | 177463013 + | 37   | 206510  | XM_011509826.1 | 57795  | DBCCR1L2 F   | protein-coding |
| BRINP2   | 1.60127259 | 3.959E-08  | chr1  | 177442761 | 177442940 + | 22   | 186524  | XM_011509826.1 | 57795  | DBCCR1L2 F   | protein-coding |
| BTBD17   | 0.9431392  | 0.00095139 | chr17 | 74514029  | 74514863 +  | 61   | -150791 | XM_011524791.2 | 388419 | BTBD17A LC   | protein-coding |
| C2orf50  | 0.70632824 | 0.02035188 | chr2  | 11113133  | 11113922 +  | 223  | -19526  | NM_182500.2    | 130813 | -            | protein-coding |
| C2orf50  | 0.70632824 | 0.02035188 | chr2  | 11112728  | 11113014 +  | 39   | -20182  | NM_182500.2    | 130813 | -            | protein-coding |
| C6       | 0.80785867 | 0.0060503  | chr5  | 41311843  | 41313230 +  | 2402 | -51050  | XM_011514114.2 | 729    | -            | protein-coding |
| C6       | 0.80785867 | 0.0060503  | chr5  | 41277596  | 41278221 +  | 198  | -16422  | XM_011514114.2 | 729    | -            | protein-coding |
| C6       | 0.80785867 | 0.0060503  | chr5  | 41263944  | 41264240 +  | 183  | -2606   | XM_011514114.2 | 729    | -            | protein-coding |
| C7       | 2.10745745 | 1.5801E-14 | chr5  | 40904910  | 40905089 +  | 11   | -4498   | NM_000587.2    | 730    | -            | protein-coding |
| CABLES1  | 1.30773682 | 7.4241E-07 | chr18 | 23089810  | 23090133 +  | 317  | -44593  | NM_001256438.1 | 91768  | CABL1 CABL   | protein-coding |
| CABLES1  | 1.30773682 | 7.4241E-07 | chr18 | 23091320  | 23091685 +  | 49   | -43062  | NM_001256438.1 | 91768  | CABL1 CABL   | protein-coding |
| CABLES1  | 1.30773682 | 7.4241E-07 | chr18 | 23227607  | 23227925 +  | 31   | 71941   | NM_138375.2    | 91768  | CABL1 CABL   | protein-coding |
| CACNA1A  | 1.63884247 | 1.3106E-10 | chr19 | 13618720  | 13619007 +  | 31   | -112403 | NM_001174080.1 | 773    | APCA BI CA   | protein-coding |
| CACNA1A  | 1.63884247 | 1.3106E-10 | chr19 | 13598311  | 13598523 +  | 31   | -91957  | NM_001174080.1 | 773    | APCA BI CA   | protein-coding |
| CACNA1C  | 1.23130667 | 3.6039E-06 | chr12 | 2378676   | 2379004 +   | 186  | 325555  | NM_199460.3    | 775    | CACH2 CACH   | protein-coding |
| CACNA1C  | 1.23130667 | 3.6039E-06 | chr12 | 2284268   | 2285104 +   | 162  | 231401  | NM_199460.3    | 775    | CACH2 CACH   | protein-coding |
| CACNA1C  | 1.23130667 | 3.6039E-06 | chr12 | 2334792   | 2335491 +   | 85   | 281856  | NM_199460.3    | 775    | CACH2 CACH   | protein-coding |
| CACNA1C  | 1.23130667 | 3.6039E-06 | chr12 | 2335813   | 2336085 +   | 23   | 282664  | NM_199460.3    | 775    | CACH2 CACH   | protein-coding |
| CACNA1C  | 1.23130667 | 3.6039E-06 | chr12 | 2357930   | 2358149 +   | 23   | 304754  | NM_199460.3    | 775    | CACH2 CACH   | protein-coding |
| CACNG6   | 0.79192802 | 0.00882406 | chr19 | 54014991  | 54015613 +  | 1097 | 23014   | NM_031897.2    | 59285  | -            | protein-coding |
| CACNG6   | 0.79192802 | 0.00882406 | chr19 | 54024175  | 54024390 +  | 66   | 31994   | NM_031897.2    | 59285  | -            | protein-coding |
| CAPN5    | 0.8783911  | 0.00128567 | chr11 | 77047793  | 77047994 +  | 30   | -19052  | NM_004055.4    | 726    | ADNVN HTRA   | protein-coding |
| CBLB     | 1.25337228 | 2.7601E-06 | chr3  | 106620557 | 106621110 + | 756  | -751281 | XM_011513257.1 | 868    | Cbl-b Nbla0f | protein-coding |
| CBLB     | 1.25337228 | 2.7601E-06 | chr3  | 106083726 | 106084329 + | 699  | -214475 | XM_011513257.1 | 868    | Cbl-b Nbla0f | protein-coding |
| CBLB     | 1.25337228 | 2.7601E-06 | chr3  | 106078564 | 106079374 + | 667  | -209417 | XM_011513257.1 | 868    | Cbl-b Nbla0f | protein-coding |
| CBLB     | 1.25337228 | 2.7601E-06 | chr3  | 106629413 | 106629816 + | 227  | -760062 | XM_011513257.1 | 868    | Cbl-b Nbla0f | protein-coding |
| CBLB     | 1.25337228 | 2.7601E-06 | chr3  | 106206090 | 106207024 + | 206  | -337005 | XM_011513257.1 | 868    | Cbl-b Nbla0f | protein-coding |
| CBLB     | 1.25337228 | 2.7601E-06 | chr3  | 106635251 | 106635676 + | 89   | -765911 | XM_011513257.1 | 868    | Cbl-b Nbla0f | protein-coding |

|         |            |            |       |           |           |   |      |                         |                                  |
|---------|------------|------------|-------|-----------|-----------|---|------|-------------------------|----------------------------------|
| CBLB    | 1.25337228 | 2.7601E-06 | chr3  | 105923859 | 105924017 | + | 54   | -54386 XM_011513257.1   | 868 Cbl-b Nbla0( protein-coding  |
| CBLB    | 1.25337228 | 2.7601E-06 | chr3  | 106485894 | 106486117 | + | 37   | -616453 XM_011513257.1  | 868 Cbl-b Nbla0( protein-coding  |
| CBLB    | 1.25337228 | 2.7601E-06 | chr3  | 106050001 | 106050152 | + | 25   | -180524 XM_011513257.1  | 868 Cbl-b Nbla0( protein-coding  |
| CBWD6   | 0.79536447 | 0.00561137 | chr9  | 43140225  | 43140556  | + | 186  | -1941525 XM_017015028.1 | 644019 CBWD7 protein-coding      |
| CBWD6   | 0.79536447 | 0.00561137 | chr9  | 40992042  | 40992295  | + | 112  | 178255 XM_017015031.1   | 644019 CBWD7 protein-coding      |
| CBWD6   | 0.79536447 | 0.00561137 | chr9  | 43139406  | 43139654  | + | 106  | -1940665 XM_017015028.1 | 644019 CBWD7 protein-coding      |
| CBWD6   | 0.79536447 | 0.00561137 | chr9  | 42323498  | 42323720  | + | 66   | -1124744 XM_017015028.1 | 644019 CBWD7 protein-coding      |
| CBWD6   | 0.79536447 | 0.00561137 | chr9  | 40097996  | 40098156  | + | 48   | 1072347 XM_017015031.1  | 644019 CBWD7 protein-coding      |
| CBWD6   | 0.79536447 | 0.00561137 | chr9  | 40511161  | 40511370  | + | 39   | 659158 XM_017015031.1   | 644019 CBWD7 protein-coding      |
| CCK     | 1.94074659 | 4.1514E-19 | chr3  | 42266663  | 42266889  | + | 106  | -581 NM_000729.5        | 885 - protein-coding             |
| CD99    | 0.54390576 | 0.00213749 | chrX  | 2628902   | 2632829   | + | 1495 | -60268 NM_001321370.1   | 4267 HBA71 MIC2 protein-coding   |
| CD99    | 0.54390576 | 0.00213749 | chrX  | 2664638   | 2665587   | + | 544  | -26021 NM_001321370.1   | 4267 HBA71 MIC2 protein-coding   |
| CD99    | 0.54390576 | 0.00213749 | chrX  | 2696657   | 2697160   | + | 248  | 5775 NM_001321369.1     | 4267 HBA71 MIC2 protein-coding   |
| CD99    | 0.54390576 | 0.00213749 | chrX  | 2314388   | 2314564   | + | 198  | -376657 NM_001321370.1  | 4267 HBA71 MIC2 protein-coding   |
| CD99    | 0.54390576 | 0.00213749 | chrX  | 2213039   | 2214545   | + | 174  | -477341 NM_001321370.1  | 4267 HBA71 MIC2 protein-coding   |
| CD99    | 0.54390576 | 0.00213749 | chrX  | 2707358   | 2707753   | + | 76   | 16422 NM_001321369.1    | 4267 HBA71 MIC2 protein-coding   |
| CD99    | 0.54390576 | 0.00213749 | chrX  | 2426459   | 2426853   | + | 66   | -264477 NM_001321370.1  | 4267 HBA71 MIC2 protein-coding   |
| CD99    | 0.54390576 | 0.00213749 | chrX  | 2533547   | 2534004   | + | 66   | -157358 NM_001321370.1  | 4267 HBA71 MIC2 protein-coding   |
| CD99    | 0.54390576 | 0.00213749 | chrX  | 2182530   | 2182845   | + | 57   | -508446 NM_001321370.1  | 4267 HBA71 MIC2 protein-coding   |
| CD99    | 0.54390576 | 0.00213749 | chrX  | 2710285   | 2710833   | + | 57   | 19426 NM_001321369.1    | 4267 HBA71 MIC2 protein-coding   |
| CD99    | 0.54390576 | 0.00213749 | chrX  | 2253166   | 2253518   | + | 48   | -437791 NM_001321370.1  | 4267 HBA71 MIC2 protein-coding   |
| CD99    | 0.54390576 | 0.00213749 | chrX  | 2325211   | 2325421   | + | 22   | -365817 NM_001321370.1  | 4267 HBA71 MIC2 protein-coding   |
| CDK18   | 2.1494929  | 6.6524E-21 | chr1  | 205472380 | 205472646 | + | 117  | -32043 NM_212502.2      | 5129 PCTAIRE PC1 protein-coding  |
| CDK18   | 2.1494929  | 6.6524E-21 | chr1  | 205423900 | 205424056 | + | 37   | -80578 NM_212502.2      | 5129 PCTAIRE PC1 protein-coding  |
| CDKN2D  | 0.76736006 | 1.6695E-05 | chr19 | 10572422  | 10572584  | + | 53   | -3524 NM_079421.2       | 1032 INK4D p19  protein-coding   |
| CDON    | 0.53317052 | 0.03540797 | chr11 | 126123634 | 126124034 | + | 150  | -60499 XM_017017873.1   | 50937 CDO CDON1 protein-coding   |
| CDON    | 0.53317052 | 0.03540797 | chr11 | 126062951 | 126063276 | + | 62   | 179 NM_016952.4         | 50937 CDO CDON1 protein-coding   |
| CDON    | 0.53317052 | 0.03540797 | chr11 | 126050491 | 126050794 | + | 43   | 8822 XM_011542863.2     | 50937 CDO CDON1 protein-coding   |
| CDYL    | 0.8993651  | 1.5112E-07 | chr6  | 4852052   | 4852790   | + | 779  | 16323 NM_001143970.1    | 9425 CDYL1 protein-coding        |
| CHRM1   | 0.81219188 | 0.00688425 | chr11 | 63145452  | 63145825  | + | 66   | -223777 XM_011544742.2  | 1128 HM1 M1 M protein-coding     |
| CHRM1   | 0.81219188 | 0.00688425 | chr11 | 63180603  | 63180809  | + | 63   | -258845 XM_011544742.2  | 1128 HM1 M1 M protein-coding     |
| CHST15  | 1.21852111 | 1.5669E-06 | chr10 | 124153013 | 124153402 | + | 314  | -59523 XM_011539857.1   | 51363 BRAG GALN protein-coding   |
| CHST15  | 1.21852111 | 1.5669E-06 | chr10 | 124145200 | 124145439 | + | 117  | -51635 XM_011539857.1   | 51363 BRAG GALN protein-coding   |
| CHST2   | 1.4908173  | 1.4429E-07 | chr3  | 143327414 | 143327714 | + | 119  | 207788 NM_004267.4      | 9435 C6ST GST-2 protein-coding   |
| CHST2   | 1.4908173  | 1.4429E-07 | chr3  | 143444016 | 143444170 | + | 45   | 324317 NM_004267.4      | 9435 C6ST GST-2 protein-coding   |
| CIB4    | 1.80542693 | 6.349E-10  | chr2  | 26655122  | 26655357  | + | 117  | -13441 XM_017003331.1   | 130106 KIP4 protein-coding       |
| CLEC11A | 0.66208182 | 0.02534245 | chr19 | 50738155  | 50740158  | + | 1010 | 15808 NM_002975.2       | 6320 CLECSF3 LSL protein-coding  |
| CMTM7   | 1.03988708 | 0.00052556 | chr3  | 32422080  | 32422419  | + | 99   | 30404 XM_011533319.2    | 112616 CKLFSF7 protein-coding    |
| COL1A2  | 1.53117455 | 3.2503E-11 | chr7  | 94265448  | 94265941  | + | 224  | -128867 NM_000089.3     | 1278 EDSARTH2 E protein-coding   |
| COL1A2  | 1.53117455 | 3.2503E-11 | chr7  | 94266181  | 94266522  | + | 61   | -128210 NM_000089.3     | 1278 EDSARTH2 E protein-coding   |
| COL1A2  | 1.53117455 | 3.2503E-11 | chr7  | 94375872  | 94376057  | + | 29   | -18597 NM_000089.3      | 1278 EDSARTH2 E protein-coding   |
| COL1A2  | 1.53117455 | 3.2503E-11 | chr7  | 94396187  | 94396399  | + | 14   | 1732 NM_000089.3        | 1278 EDSARTH2 E protein-coding   |
| COL20A1 | 1.40457284 | 2.9161E-06 | chr20 | 63326517  | 63327470  | + | 1344 | 33807 NM_020882.2       | 57642 - protein-coding           |
| COL20A1 | 1.40457284 | 2.9161E-06 | chr20 | 63339895  | 63340394  | + | 19   | 46958 NM_020882.2       | 57642 - protein-coding           |
| COL4A1  | 1.07267499 | 0.00013192 | chr13 | 110228254 | 110228539 | + | 106  | 78354 XM_011521048.2    | 1282 BSVD BSVD: protein-coding   |
| COL4A1  | 1.07267499 | 0.00013192 | chr13 | 110255757 | 110255981 | + | 85   | 50881 XM_011521048.2    | 1282 BSVD BSVD: protein-coding   |
| COL4A1  | 1.07267499 | 0.00013192 | chr13 | 110247619 | 110247777 | + | 48   | 59052 XM_011521048.2    | 1282 BSVD BSVD: protein-coding   |
| COL4A1  | 1.07267499 | 0.00013192 | chr13 | 110233214 | 110233381 | + | 31   | 73453 XM_011521048.2    | 1282 BSVD BSVD: protein-coding   |
| COL4A2  | 0.72994474 | 0.00418101 | chr13 | 110412197 | 110412542 | + | 117  | 105085 NM_001846.2      | 1284 BSVD2 ICH  protein-coding   |
| COL4A2  | 0.72994474 | 0.00418101 | chr13 | 110320298 | 110320615 | + | 80   | 13172 NM_001846.2       | 1284 BSVD2 ICH  protein-coding   |
| COL4A2  | 0.72994474 | 0.00418101 | chr13 | 110319890 | 110320085 | + | 29   | 12703 NM_001846.2       | 1284 BSVD2 ICH  protein-coding   |
| COL5A1  | 2.05906728 | 4.1601E-38 | chr9  | 134712441 | 134712615 | + | 48   | 70723 NM_001278074.1    | 1289 EDSC EDSCL protein-coding   |
| COL5A1  | 2.05906728 | 4.1601E-38 | chr9  | 134712024 | 134712175 | + | 31   | 70294 NM_001278074.1    | 1289 EDSC EDSCL protein-coding   |
| COL6A1  | 0.71715877 | 0.00088485 | chr21 | 45973619  | 45973835  | + | 48   | -8022 NM_001848.2       | 1291 BTHLM1 OP protein-coding    |
| CORO1A  | 0.79201971 | 0.00058129 | chr16 | 30193351  | 30193946  | + | 314  | 9430 XM_017022886.1     | 11151 CLABP CLIP1 protein-coding |
| CREB3L1 | 0.93982505 | 0.00022051 | chr11 | 46242908  | 46243485  | + | 63   | -34442 NM_052854.3      | 90993 OASIS OI16 protein-coding  |
| CREB3L1 | 0.93982505 | 0.00022051 | chr11 | 46295616  | 46295786  | + | 48   | 18040 XM_006718380.3    | 90993 OASIS OI16 protein-coding  |
| CREB3L1 | 0.93982505 | 0.00022051 | chr11 | 46239181  | 46239398  | + | 44   | -38349 NM_052854.3      | 90993 OASIS OI16 protein-coding  |
| CREB3L2 | 0.68851735 | 0.0165667  | chr7  | 137898941 | 137899769 | + | 236  | 33633 NM_001318246.1    | 64764 BFB2H7 protein-coding      |
| CREB3L2 | 0.68851735 | 0.0165667  | chr7  | 137000464 | 137000687 | + | 57   | 932413 NM_001318246.1   | 64764 BFB2H7 protein-coding      |
| CXCR4   | 1.37774266 | 1.5557E-06 | chr2  | 136801774 | 136801947 | + | 48   | -683705 NM_003467.2     | 7852 CD184 D2S2 protein-coding   |
| CYB5D2  | 0.56529621 | 0.00399478 | chr17 | 4143113   | 4143757   | + | 86   | -39 XM_017024183.1      | 124936 - protein-coding          |
| CYP4V2  | 0.50200457 | 0.00831172 | chr4  | 186203477 | 186203830 | + | 195  | 11918 XM_005262935.3    | 285440 BCD CYP4A protein-coding  |
| CYP4V2  | 0.50200457 | 0.00831172 | chr4  | 186191413 | 186191571 | + | 31   | -28 NM_207352.3         | 285440 BCD CYP4A protein-coding  |
| DAP     | 0.50938731 | 0.04949398 | chr5  | 10704990  | 10705234  | + | 198  | 56163 NM_001291963.1    | 1611 - protein-coding            |
| DDIT4   | 0.78702331 | 0.0018775  | chr10 | 72297201  | 72297630  | + | 236  | 23496 NM_019058.2       | 54541 Dig2 REDD-1 protein-coding |
| DDIT4   | 0.78702331 | 0.0018775  | chr10 | 72272794  | 72273142  | + | 106  | -951 NM_019058.2        | 54541 Dig2 REDD-1 protein-coding |
| DGKG    | 0.65634534 | 6.1791E-05 | chr3  | 186247696 | 186248518 | + | 1063 | 114127 NM_001080744.1   | 1608 DAGK3 DGK protein-coding    |
| DGKG    | 0.65634534 | 6.1791E-05 | chr3  | 186242550 | 186242769 | + | 76   | 119575 NM_001080744.1   | 1608 DAGK3 DGK protein-coding    |
| DISP1   | 0.67240683 | 0.02453111 | chr1  | 223180715 | 223181095 | + | 116  | 237640 XM_017002612.1   | 84976 DISPA protein-coding       |
| DISP1   | 0.67240683 | 0.02453111 | chr1  | 223153467 | 223153618 | + | 48   | 210277 XM_017002612.1   | 84976 DISPA protein-coding       |
| DISP1   | 0.67240683 | 0.02453111 | chr1  | 223022638 | 223022802 | + | 48   | 79455 XM_017002612.1    | 84976 DISPA protein-coding       |
| DISP1   | 0.67240683 | 0.02453111 | chr1  | 223179412 | 223179568 | + | 30   | 236225 XM_017002612.1   | 84976 DISPA protein-coding       |
| DISP1   | 0.67240683 | 0.02453111 | chr1  | 222994559 | 222994717 | + | 22   | 51373 XM_017002612.1    | 84976 DISPA protein-coding       |

|         |            |            |       |           |           |   |      |         |                |        |            |                |
|---------|------------|------------|-------|-----------|-----------|---|------|---------|----------------|--------|------------|----------------|
| DKK3    | 1.11680091 | 0.00010298 | chr11 | 12066944  | 12067211  | + | 57   | -57707  | NM_013253.4    | 27122  | REIC RIG   | protein-coding |
| DPEP1   | 4.38314978 | 7.9576E-63 | chr16 | 89616209  | 89617547  | + | 2518 | 10      | XM_005256286.3 | 1800   | MBD1 MDP   | protein-coding |
| DPEP1   | 4.38314978 | 7.9576E-63 | chr16 | 89634459  | 89635271  | + | 978  | 12582   | XM_011522925.2 | 1800   | MBD1 MDP   | protein-coding |
| DPEP1   | 4.38314978 | 7.9576E-63 | chr16 | 89602528  | 89602718  | + | 57   | -10685  | NM_001128141.2 | 1800   | MBD1 MDP   | protein-coding |
| DPEP1   | 4.38314978 | 7.9576E-63 | chr16 | 89618509  | 89618888  | + | 39   | 1830    | XM_005256286.3 | 1800   | MBD1 MDP   | protein-coding |
| DPEP1   | 4.38314978 | 7.9576E-63 | chr16 | 89617861  | 89618335  | + | 39   | 1230    | XM_005256286.3 | 1800   | MBD1 MDP   | protein-coding |
| DTX4    | 0.87787069 | 0.00131908 | chr11 | 59200305  | 59200460  | + | 20   | 27514   | XM_006718483.3 | 23220  | RNF155     | protein-coding |
| DUSP26  | 1.62012059 | 3.2058E-15 | chr8  | 34191372  | 34192430  | + | 1277 | -591795 | NM_024025.2    | 78986  | DSP-4 DUSP | protein-coding |
| DUSP26  | 1.62012059 | 3.2058E-15 | chr8  | 33614992  | 33615434  | + | 328  | -15107  | NM_024025.2    | 78986  | DSP-4 DUSP | protein-coding |
| DUSP26  | 1.62012059 | 3.2058E-15 | chr8  | 34065352  | 34065980  | + | 261  | -465560 | NM_024025.2    | 78986  | DSP-4 DUSP | protein-coding |
| DUSP26  | 1.62012059 | 3.2058E-15 | chr8  | 33847396  | 33847645  | + | 96   | -247414 | NM_024025.2    | 78986  | DSP-4 DUSP | protein-coding |
| DUSP26  | 1.62012059 | 3.2058E-15 | chr8  | 34190241  | 34190712  | + | 38   | -590370 | NM_024025.2    | 78986  | DSP-4 DUSP | protein-coding |
| EDNRA   | 0.56827583 | 0.02886367 | chr4  | 147420697 | 147422037 | + | 2352 | -59550  | NM_001957.3    | 1909   | ET-A ETA E | protein-coding |
| EDNRA   | 0.56827583 | 0.02886367 | chr4  | 147334284 | 147335052 | + | 355  | -146249 | NM_001957.3    | 1909   | ET-A ETA E | protein-coding |
| EDNRA   | 0.56827583 | 0.02886367 | chr4  | 147335191 | 147335516 | + | 134  | -145564 | NM_001957.3    | 1909   | ET-A ETA E | protein-coding |
| EDNRA   | 0.56827583 | 0.02886367 | chr4  | 147336324 | 147336584 | + | 65   | -144463 | NM_001957.3    | 1909   | ET-A ETA E | protein-coding |
| EDNRA   | 0.56827583 | 0.02886367 | chr4  | 147312479 | 147312774 | + | 48   | -168291 | NM_001957.3    | 1909   | ET-A ETA E | protein-coding |
| EDNRA   | 0.56827583 | 0.02886367 | chr4  | 147498071 | 147498497 | + | 39   | 17367   | NM_001166055.1 | 1909   | ET-A ETA E | protein-coding |
| EFCAB12 | 0.77398341 | 0.0089643  | chr3  | 129399216 | 129400154 | + | 1562 | 13813   | XM_011513298.1 | 90288  | C3orf25    | protein-coding |
| EFNB3   | 0.75951928 | 0.00023359 | chr17 | 7717260   | 7717458   | + | 57   | 12157   | NM_001406.3    | 1949   | EFL6 EPLG8 | protein-coding |
| EHD3    | 0.78382549 | 0.00275226 | chr2  | 31377960  | 31378272  | + | 278  | 123198  | XM_011532806.2 | 30845  | PAST3      | protein-coding |
| EHD3    | 0.78382549 | 0.00275226 | chr2  | 31287835  | 31288016  | + | 76   | 33007   | XM_011532806.2 | 30845  | PAST3      | protein-coding |
| ESRRB   | 1.13794995 | 1.0438E-05 | chr14 | 76313639  | 76314184  | + | 86   | -57436  | NM_004452.3    | 2103   | DFNB35 ERF | protein-coding |
| ESRRB   | 1.13794995 | 1.0438E-05 | chr14 | 76516987  | 76517211  | + | 57   | 112750  | XM_017021085.1 | 2103   | DFNB35 ERF | protein-coding |
| ESRRB   | 1.13794995 | 1.0438E-05 | chr14 | 76518377  | 76518697  | + | 57   | 114188  | XM_017021085.1 | 2103   | DFNB35 ERF | protein-coding |
| ESRRB   | 1.13794995 | 1.0438E-05 | chr14 | 76429721  | 76430116  | + | 57   | 25569   | XM_017021085.1 | 2103   | DFNB35 ERF | protein-coding |
| ESRRB   | 1.13794995 | 1.0438E-05 | chr14 | 76447121  | 76447363  | + | 48   | 42893   | XM_017021085.1 | 2103   | DFNB35 ERF | protein-coding |
| ETV5    | 0.69821591 | 0.0091027  | chr3  | 186097776 | 186098123 | + | 71   | 11163   | NM_004454.2    | 2119   | ERM        | protein-coding |
| ETV5    | 0.69821591 | 0.0091027  | chr3  | 186183046 | 186183227 | + | 66   | -74024  | NM_004454.2    | 2119   | ERM        | protein-coding |
| ETV5    | 0.69821591 | 0.0091027  | chr3  | 186099271 | 186099478 | + | 48   | 9738    | NM_004454.2    | 2119   | ERM        | protein-coding |
| ETV5    | 0.69821591 | 0.0091027  | chr3  | 186100528 | 186100686 | + | 39   | 8505    | NM_004454.2    | 2119   | ERM        | protein-coding |
| ETV5    | 0.69821591 | 0.0091027  | chr3  | 186104003 | 186104187 | + | 16   | 5017    | NM_004454.2    | 2119   | ERM        | protein-coding |
| EVL3    | 0.52239735 | 0.01616173 | chr19 | 7799652   | 7799803   | + | 31   | -30548  | NM_145245.4    | 115704 | -          | protein-coding |
| EXD3    | 0.74263425 | 0.01038836 | chr9  | 137355324 | 137355830 | + | 816  | 1720    | XM_011518814.1 | 54932  | mut-7      | protein-coding |
| FABP3   | 0.8635989  | 0.00314179 | chr1  | 31469777  | 31469956  | + | 57   | -96248  | XM_011541007.2 | 2170   | FABP11 H-F | protein-coding |
| FANK1   | 1.40006359 | 6.0358E-07 | chr10 | 126135918 | 126136213 | + | 139  | 140556  | XM_017016926.1 | 92565  | HSD13      | protein-coding |
| FARS2   | 0.56117278 | 0.04348711 | chr6  | 5581626   | 5582467   | + | 310  | 320695  | XM_011514247.2 | 10667  | COXP14 FA  | protein-coding |
| FARS2   | 0.56117278 | 0.04348711 | chr6  | 5632383   | 5632941   | + | 291  | 371311  | XM_011514247.2 | 10667  | COXP14 FA  | protein-coding |
| FARS2   | 0.56117278 | 0.04348711 | chr6  | 5600745   | 5601114   | + | 128  | 339578  | XM_011514247.2 | 10667  | COXP14 FA  | protein-coding |
| FARS2   | 0.56117278 | 0.04348711 | chr6  | 5497984   | 5498190   | + | 61   | 236736  | XM_011514247.2 | 10667  | COXP14 FA  | protein-coding |
| FAS     | 0.79313672 | 0.00520553 | chr10 | 88986039  | 88987707  | + | 2315 | 115     | XM_011539766.2 | 355    | ALPS1A APC | protein-coding |
| FAS     | 0.79313672 | 0.00520553 | chr10 | 88989916  | 88990322  | + | 184  | -440    | NM_001320619.1 | 355    | ALPS1A APC | protein-coding |
| FAS     | 0.79313672 | 0.00520553 | chr10 | 88985703  | 88985925  | + | 28   | -944    | XM_011539766.2 | 355    | ALPS1A APC | protein-coding |
| FBLN5   | 1.17214177 | 9.2805E-09 | chr14 | 91919233  | 91919515  | + | 139  | 27661   | XM_005267267.3 | 10516  | ADCL2 ARCL | protein-coding |
| FBXL7   | 0.50952651 | 0.02015883 | chr5  | 15917567  | 15917819  | + | 162  | 301710  | XM_011513998.1 | 23194  | FBL6 FBL7  | protein-coding |
| FBXO32  | 0.74841773 | 0.00823914 | chr8  | 123611827 | 123612718 | + | 426  | -71019  | NM_001242463.1 | 114907 | Fbx32 MAF  | protein-coding |
| FCHSD2  | 1.18023264 | 1.3775E-06 | chr11 | 73142373  | 73142596  | + | 57   | -386    | NM_014824.2    | 9873   | NWK NWK1   | protein-coding |
| FGFBP2  | 2.40913979 | 7.5438E-17 | chr4  | 15856166  | 15856509  | + | 291  | 106899  | NM_031950.3    | 83888  | HBP17RP KS | protein-coding |
| FGFBP2  | 2.40913979 | 7.5438E-17 | chr4  | 15884709  | 15884934  | + | 86   | 78415   | NM_031950.3    | 83888  | HBP17RP KS | protein-coding |
| FGFBP2  | 2.40913979 | 7.5438E-17 | chr4  | 15978943  | 15979116  | + | 53   | -15793  | NM_031950.3    | 83888  | HBP17RP KS | protein-coding |
| FGFR1   | 0.50504627 | 0.0103752  | chr8  | 38525842  | 38526027  | + | 86   | -57100  | NM_023110.2    | 2260   | BFGFR CD3  | protein-coding |
| FGFR1   | 0.50504627 | 0.0103752  | chr8  | 38527994  | 38528500  | + | 57   | -59413  | NM_023110.2    | 2260   | BFGFR CD3  | protein-coding |
| FKBP9   | 0.67777422 | 3.4559E-05 | chr7  | 32980254  | 32980426  | + | 57   | 866     | NM_001284343.1 | 11328  | FKBP60 FKB | protein-coding |
| FLRT2   | 1.04386005 | 1.1773E-05 | chr14 | 86512863  | 86514092  | + | 1479 | 926015  | XM_017021131.1 | 23768  | -          | protein-coding |
| FLRT2   | 1.04386005 | 1.1773E-05 | chr14 | 86071625  | 86072066  | + | 1064 | 484383  | XM_017021131.1 | 23768  | -          | protein-coding |
| FLRT2   | 1.04386005 | 1.1773E-05 | chr14 | 86465564  | 86465990  | + | 803  | 878315  | XM_017021131.1 | 23768  | -          | protein-coding |
| FLRT2   | 1.04386005 | 1.1773E-05 | chr14 | 86665799  | 86666702  | + | 726  | 1078788 | XM_017021131.1 | 23768  | -          | protein-coding |
| FLRT2   | 1.04386005 | 1.1773E-05 | chr14 | 86668488  | 86668813  | + | 348  | 1081188 | XM_017021131.1 | 23768  | -          | protein-coding |
| FLRT2   | 1.04386005 | 1.1773E-05 | chr14 | 86327570  | 86328127  | + | 284  | 740386  | XM_017021131.1 | 23768  | -          | protein-coding |
| FLRT2   | 1.04386005 | 1.1773E-05 | chr14 | 86465090  | 86465417  | + | 168  | 877791  | XM_017021131.1 | 23768  | -          | protein-coding |
| FLRT2   | 1.04386005 | 1.1773E-05 | chr14 | 86331328  | 86331799  | + | 148  | 744101  | XM_017021131.1 | 23768  | -          | protein-coding |
| FLRT2   | 1.04386005 | 1.1773E-05 | chr14 | 85587108  | 85587351  | + | 113  | -233    | XM_017021130.1 | 23768  | -          | protein-coding |
| FLRT2   | 1.04386005 | 1.1773E-05 | chr14 | 86142025  | 86142370  | + | 104  | 554735  | XM_017021131.1 | 23768  | -          | protein-coding |
| FLRT2   | 1.04386005 | 1.1773E-05 | chr14 | 86419179  | 86419543  | + | 96   | 831899  | XM_017021131.1 | 23768  | -          | protein-coding |
| FLRT2   | 1.04386005 | 1.1773E-05 | chr14 | 86072208  | 86072889  | + | 61   | 485086  | XM_017021131.1 | 23768  | -          | protein-coding |
| FLRT2   | 1.04386005 | 1.1773E-05 | chr14 | 86787942  | 86788099  | + | 45   | 1200558 | XM_017021131.1 | 23768  | -          | protein-coding |
| FOXO3   | 0.50337817 | 0.04114003 | chr6  | 108562680 | 108562947 | + | 151  | 804     | XM_011535626.1 | 2309   | AF6q21 FKH | protein-coding |
| FOXO3   | 0.50337817 | 0.04114003 | chr6  | 108560105 | 108560329 | + | 57   | 394     | NM_201559.2    | 2309   | AF6q21 FKH | protein-coding |
| FRK     | 0.64732968 | 0.00596968 | chr6  | 115932438 | 115932986 | + | 186  | 128406  | NM_002031.2    | 2444   | GTK PTK5 R | protein-coding |
| FRK     | 0.64732968 | 0.00596968 | chr6  | 115311335 | 115311550 | + | 96   | 749316  | NM_002031.2    | 2444   | GTK PTK5 R | protein-coding |
| FRK     | 0.64732968 | 0.00596968 | chr6  | 115969635 | 115969799 | + | 48   | 91041   | NM_002031.2    | 2444   | GTK PTK5 R | protein-coding |
| FUCA1   | 1.04520949 | 1.6548E-08 | chr1  | 23899885  | 23900189  | + | 37   | -31668  | NM_000147.4    | 2517   | FUCA       | protein-coding |
| FUCA1   | 1.04520949 | 1.6548E-08 | chr1  | 23869175  | 23869333  | + | 23   | -885    | NM_000147.4    | 2517   | FUCA       | protein-coding |
| FUCA1   | 1.04520949 | 1.6548E-08 | chr1  | 23868403  | 23868590  | + | 22   | -127    | NM_000147.4    | 2517   | FUCA       | protein-coding |

|           |            |            |       |           |           |   |      |          |                |        |             |                |
|-----------|------------|------------|-------|-----------|-----------|---|------|----------|----------------|--------|-------------|----------------|
| FYN       | 0.73412077 | 0.00553801 | chr6  | 111950055 | 111950314 | + | 86   | -76732   | NM_002037.5    | 2534   | SLK SYN p5  | protein-coding |
| FZD8      | 0.59246934 | 0.04503946 | chr10 | 36635925  | 36637175  | + | 1678 | -995116  | NM_031866.2    | 8325   | FZ-8 hFZ8   | protein-coding |
| FZD8      | 0.59246934 | 0.04503946 | chr10 | 35595083  | 35595788  | + | 910  | 45999    | NM_031866.2    | 8325   | FZ-8 hFZ8   | protein-coding |
| FZD8      | 0.59246934 | 0.04503946 | chr10 | 36725563  | 36726146  | + | 384  | -1084420 | NM_031866.2    | 8325   | FZ-8 hFZ8   | protein-coding |
| FZD8      | 0.59246934 | 0.04503946 | chr10 | 36634773  | 36635455  | + | 213  | -993680  | NM_031866.2    | 8325   | FZ-8 hFZ8   | protein-coding |
| FZD8      | 0.59246934 | 0.04503946 | chr10 | 36423866  | 36424344  | + | 186  | -782671  | NM_031866.2    | 8325   | FZ-8 hFZ8   | protein-coding |
| FZD8      | 0.59246934 | 0.04503946 | chr10 | 35652068  | 35652471  | + | 92   | -10835   | NM_031866.2    | 8325   | FZ-8 hFZ8   | protein-coding |
| FZD8      | 0.59246934 | 0.04503946 | chr10 | 35630713  | 35631024  | + | 66   | 10566    | NM_031866.2    | 8325   | FZ-8 hFZ8   | protein-coding |
| FZD8      | 0.59246934 | 0.04503946 | chr10 | 36573277  | 36573485  | + | 65   | -931947  | NM_031866.2    | 8325   | FZ-8 hFZ8   | protein-coding |
| FZD8      | 0.59246934 | 0.04503946 | chr10 | 36424647  | 36424931  | + | 59   | -783355  | NM_031866.2    | 8325   | FZ-8 hFZ8   | protein-coding |
| FZD8      | 0.59246934 | 0.04503946 | chr10 | 36449495  | 36449663  | + | 48   | -808145  | NM_031866.2    | 8325   | FZ-8 hFZ8   | protein-coding |
| FZD8      | 0.59246934 | 0.04503946 | chr10 | 36538908  | 36539075  | + | 29   | -897557  | NM_031866.2    | 8325   | FZ-8 hFZ8   | protein-coding |
| FZD8      | 0.59246934 | 0.04503946 | chr10 | 36635674  | 36635828  | + | 22   | -994317  | NM_031866.2    | 8325   | FZ-8 hFZ8   | protein-coding |
| GDNF      | 0.99808833 | 4.9721E-06 | chr5  | 37721321  | 37722083  | + | 312  | 113120   | NM_001278098.1 | 2668   | ATF ATF1 A  | protein-coding |
| GDNF      | 0.99808833 | 4.9721E-06 | chr5  | 37663743  | 37663894  | + | 37   | 171004   | NM_001278098.1 | 2668   | ATF ATF1 A  | protein-coding |
| GDNF      | 0.99808833 | 4.9721E-06 | chr5  | 37837252  | 37837611  | + | 22   | -1604    | NM_001190469.1 | 2668   | ATF ATF1 A  | protein-coding |
| GPD2      | 0.9627399  | 0.00065594 | chr2  | 154620616 | 154621435 | + | 559  | -1814265 | XM_011510977.2 | 2820   | GDH2 GPDN   | protein-coding |
| GPD2      | 0.9627399  | 0.00065594 | chr2  | 156334611 | 156334830 | + | 106  | -100570  | XM_011510977.2 | 2820   | GDH2 GPDN   | protein-coding |
| GPD2      | 0.9627399  | 0.00065594 | chr2  | 156332705 | 156332986 | + | 57   | -102445  | XM_011510977.2 | 2820   | GDH2 GPDN   | protein-coding |
| GPD2      | 0.9627399  | 0.00065594 | chr2  | 155209686 | 155210029 | + | 54   | -1225433 | XM_011510977.2 | 2820   | GDH2 GPDN   | protein-coding |
| GPD2      | 0.9627399  | 0.00065594 | chr2  | 156401243 | 156401516 | + | 32   | -33911   | XM_011510977.2 | 2820   | GDH2 GPDN   | protein-coding |
| GPD2      | 0.9627399  | 0.00065594 | chr2  | 156400897 | 156401147 | + | 31   | -34268   | XM_011510977.2 | 2820   | GDH2 GPDN   | protein-coding |
| GPR17     | 1.57909826 | 1.6741E-12 | chr2  | 127649022 | 127649369 | + | 162  | -79      | XM_017003833.1 | 2840   | -           | protein-coding |
| GRIN2C    | 0.87448318 | 0.00316268 | chr17 | 74823096  | 74823398  | + | 106  | 33265    | XM_011524692.2 | 2905   | GluN2C NM   | protein-coding |
| GTF2IRD2  | 0.67179954 | 0.00641077 | chr7  | 75092315  | 75092576  | + | 48   | -111     | NM_001003795.2 | 389524 | GTF2IRD2 G  | protein-coding |
| GTF2IRD2B | 0.67179954 | 0.00641077 | chr7  | 75092967  | 75093224  | + | 23   | 539      | NM_001003795.2 | 389524 | GTF2IRD2 G  | protein-coding |
| GYG2      | 1.12236886 | 4.8371E-06 | chrX  | 2816863   | 2817714   | + | 1202 | -11424   | XM_017029929.1 | 8908   | GN-2 GN2    | protein-coding |
| GYG2      | 1.12236886 | 4.8371E-06 | chrX  | 2804885   | 2805264   | + | 106  | -23638   | XM_017029929.1 | 8908   | GN-2 GN2    | protein-coding |
| GYG2      | 1.12236886 | 4.8371E-06 | chrX  | 2812346   | 2812816   | + | 80   | -16131   | XM_017029929.1 | 8908   | GN-2 GN2    | protein-coding |
| H6PD      | 0.52653002 | 0.03794594 | chr1  | 9253136   | 9253337   | + | 14   | 7999     | XM_017002866.1 | 9563   | CORTRD1 G   | protein-coding |
| HACD1     | 0.50076936 | 0.0151179  | chr10 | 17562646  | 17562797  | + | 39   | 54652    | XM_005252641.4 | 9200   | CAP PTPLA   | protein-coding |
| HHIPL2    | 0.64060128 | 0.03369848 | chr1  | 222455501 | 222455669 | + | 57   | 92462    | XM_011509986.1 | 79802  | KIAA1822L   | protein-coding |
| HIST1H2BD | 0.76183782 | 0.00097417 | chr6  | 26158373  | 26158649  | + | 48   | 390      | NM_021063.3    | 3017   | H2B.1B H2B  | protein-coding |
| HIST1H2BD | 0.76183782 | 0.00097417 | chr6  | 26157237  | 26158158  | + | 37   | -288     | XM_005249039.3 | 3017   | H2B.1B H2B  | protein-coding |
| HIST2H2BE | 0.53059061 | 0.0182324  | chr1  | 149832333 | 149832848 | + | 128  | 54092    | NM_003528.2    | 8349   | GL105 H2B   | protein-coding |
| HIST2H2BE | 0.53059061 | 0.0182324  | chr1  | 149712443 | 149712664 | + | 117  | 174129   | NM_003528.2    | 8349   | GL105 H2B   | protein-coding |
| HIST2H2BE | 0.53059061 | 0.0182324  | chr1  | 149860946 | 149861436 | + | 57   | 25491    | NM_003528.2    | 8349   | GL105 H2B   | protein-coding |
| HIST2H2BE | 0.53059061 | 0.0182324  | chr1  | 149842650 | 149842962 | + | 48   | 43876    | NM_003528.2    | 8349   | GL105 H2B   | protein-coding |
| HIST2H2BE | 0.53059061 | 0.0182324  | chr1  | 149852578 | 149852752 | + | 31   | 34017    | NM_003528.2    | 8349   | GL105 H2B   | protein-coding |
| HOMER3    | 0.73548079 | 0.01002439 | chr19 | 18985291  | 18985643  | + | 96   | -44209   | XM_006722943.1 | 9454   | HOMER-3 V   | protein-coding |
| HS3ST2    | 3.92159034 | 1.3561E-46 | chr16 | 22818773  | 22819235  | + | 198  | 4465     | NM_006043.1    | 9956   | 3OST2 3OST  | protein-coding |
| HS3ST4    | 0.71620557 | 8.7086E-05 | chr16 | 25799692  | 25800525  | + | 1395 | 108082   | NM_006040.2    | 9951   | 3-OST-4 3OS | protein-coding |
| HS3ST4    | 0.71620557 | 8.7086E-05 | chr16 | 25819522  | 25819879  | + | 248  | 127674   | NM_006040.2    | 9951   | 3-OST-4 3OS | protein-coding |
| HS3ST4    | 0.71620557 | 8.7086E-05 | chr16 | 26371491  | 26371779  | + | 106  | 679609   | NM_006040.2    | 9951   | 3-OST-4 3OS | protein-coding |
| HS3ST4    | 0.71620557 | 8.7086E-05 | chr16 | 25789320  | 25789556  | + | 89   | 97412    | NM_006040.2    | 9951   | 3-OST-4 3OS | protein-coding |
| HS3ST4    | 0.71620557 | 8.7086E-05 | chr16 | 25750900  | 25751086  | + | 49   | 58967    | NM_006040.2    | 9951   | 3-OST-4 3OS | protein-coding |
| HS3ST4    | 0.71620557 | 8.7086E-05 | chr16 | 26070999  | 26071150  | + | 19   | 379048   | NM_006040.2    | 9951   | 3-OST-4 3OS | protein-coding |
| HS3ST4    | 0.71620557 | 8.7086E-05 | chr16 | 25812415  | 25812664  | + | 14   | 120513   | NM_006040.2    | 9951   | 3-OST-4 3OS | protein-coding |
| ICAM2     | 1.07758619 | 0.0003376  | chr17 | 64014282  | 64014820  | + | 172  | 6083     | NM_001099788.1 | 3384   | CD102       | protein-coding |
| IDNK      | 1.13450794 | 1.8691E-05 | chr9  | 83622541  | 83623638  | + | 795  | 40       | NM_001256915.1 | 414328 | C9orf103 bA | protein-coding |
| IDNK      | 1.13450794 | 1.8691E-05 | chr9  | 83665506  | 83666470  | + | 756  | 39359    | XM_017014724.1 | 414328 | C9orf103 bA | protein-coding |
| IDNK      | 1.13450794 | 1.8691E-05 | chr9  | 83646428  | 83647121  | + | 559  | 20145    | XM_017014724.1 | 414328 | C9orf103 bA | protein-coding |
| IDNK      | 1.13450794 | 1.8691E-05 | chr9  | 83620925  | 83621141  | + | 37   | -1291    | XM_017014722.1 | 414328 | C9orf103 bA | protein-coding |
| IFI44L    | 1.44826419 | 3.3853E-09 | chr1  | 78577422  | 78577770  | + | 113  | -42786   | NM_006820.3    | 10964  | C1orf29 GS3 | protein-coding |
| IGFBP2    | 0.79194016 | 0.00078463 | chr2  | 216619392 | 216619977 | + | 369  | -13144   | NM_001313993.1 | 3485   | IBP2 IGF-BP | protein-coding |
| IGFBP2    | 0.79194016 | 0.00078463 | chr2  | 216596165 | 216596585 | + | 168  | -36453   | NM_001313993.1 | 3485   | IBP2 IGF-BP | protein-coding |
| IGFBP2    | 0.79194016 | 0.00078463 | chr2  | 216597166 | 216597489 | + | 153  | -35501   | NM_001313993.1 | 3485   | IBP2 IGF-BP | protein-coding |
| IGFBP5    | 0.65951523 | 0.00728995 | chr2  | 217223448 | 217223704 | + | 102  | -528027  | NM_000599.3    | 3488   | IBP5        | protein-coding |
| IKZF1     | 1.73648791 | 1.4434E-12 | chr7  | 50342770  | 50343140  | + | 355  | 23907    | NM_001220767.2 | 10320  | CVID13 Hs.5 | protein-coding |
| IKZF1     | 1.73648791 | 1.4434E-12 | chr7  | 50242186  | 50242356  | + | 45   | -61182   | XM_011515078.2 | 10320  | CVID13 Hs.5 | protein-coding |
| IL16      | 0.5980185  | 0.01776814 | chr15 | 81296766  | 81296956  | + | 14   | -52      | NM_004513.5    | 3603   | LCF NIL16 P | protein-coding |
| INPP4B    | 0.71391873 | 0.00035874 | chr4  | 142405142 | 142406047 | + | 426  | -97471   | XM_017008797.1 | 8821   | -           | protein-coding |
| INPP4B    | 0.71391873 | 0.00035874 | chr4  | 142423980 | 142424299 | + | 172  | -116016  | XM_017008797.1 | 8821   | -           | protein-coding |
| INPP4B    | 0.71391873 | 0.00035874 | chr4  | 141802382 | 141802625 | + | 30   | 503323   | XM_005263323.3 | 8821   | -           | protein-coding |
| INSR      | 0.67713843 | 0.01445434 | chr19 | 7197677   | 7197928   | + | 57   | 96500    | NM_001079817.2 | 3643   | CD220 HHF5  | protein-coding |
| IRX3      | 1.49069249 | 3.98E-17   | chr16 | 54474895  | 54475538  | + | 1149 | -188444  | XM_005256139.3 | 79191  | IRX-1 IRXB1 | protein-coding |
| IRX3      | 1.49069249 | 3.98E-17   | chr16 | 54455203  | 54455932  | + | 499  | -168795  | XM_005256139.3 | 79191  | IRX-1 IRXB1 | protein-coding |
| IRX3      | 1.49069249 | 3.98E-17   | chr16 | 54456398  | 54456734  | + | 328  | -169794  | XM_005256139.3 | 79191  | IRX-1 IRXB1 | protein-coding |
| IRX3      | 1.49069249 | 3.98E-17   | chr16 | 54050454  | 54051026  | + | 66   | 235726   | NM_024336.2    | 79191  | IRX-1 IRXB1 | protein-coding |
| ITGA4     | 0.59481333 | 0.02719687 | chr2  | 181411101 | 181411401 | + | 86   | -45641   | NM_001316312.1 | 3676   | CD49D IA4   | protein-coding |
| ITGA9     | 0.79791383 | 0.00161376 | chr3  | 37511975  | 37512126  | + | 57   | 59728    | NM_002207.2    | 3680   | ALPHA-RLC I | protein-coding |
| ITGA9     | 0.79791383 | 0.00161376 | chr3  | 37493161  | 37493317  | + | 48   | 40917    | NM_002207.2    | 3680   | ALPHA-RLC I | protein-coding |
| ITGAM     | 0.83963945 | 0.00167525 | chr16 | 31262163  | 31262493  | + | 198  | 2353     | XM_006721045.1 | 3684   | CD11B CR3A  | protein-coding |
| KANK2     | 0.50258172 | 0.00076859 | chr19 | 11210469  | 11210752  | + | 128  | -13043   | NM_001136191.2 | 25959  | ANKRD25 M   | protein-coding |

|             |            |            |       |           |           |   |      |         |                |           |           |        |                |                |
|-------------|------------|------------|-------|-----------|-----------|---|------|---------|----------------|-----------|-----------|--------|----------------|----------------|
| KANK2       | 0.50258172 | 0.00076859 | chr19 | 11209466  | 11210365  | + | 128  | -12348  | NM_001136191.2 | 25959     | ANKRD25   | M      | protein-coding |                |
| KANK3       | 0.8136441  | 0.00024156 | chr19 | 8349634   | 8350078   | + | 236  | -6594   | NM_198471.2    | 256949    | ANKRD47   |        | protein-coding |                |
| KCNE3       | 0.78894917 | 0.00242961 | chr11 | 74468353  | 74469230  | + | 664  | -1062   | XM_017017052.1 | 10008     | BRGDA6    | HO     | protein-coding |                |
| KCNE3       | 0.78894917 | 0.00242961 | chr11 | 74449388  | 74449889  | + | 45   | 13217   | XM_017017049.1 | 10008     | BRGDA6    | HO     | protein-coding |                |
| KCNE3       | 0.78894917 | 0.00242961 | chr11 | 74470636  | 74470881  | + | 22   | -3029   | XM_017017052.1 | 10008     | BRGDA6    | HO     | protein-coding |                |
| KCNK15      | 2.25021319 | 4.1287E-15 | chr20 | 44720864  | 44721394  | + | 48   | 24476   | XM_017028003.1 | 60598     | K2p15.1   | KCf    | protein-coding |                |
| KCNK3       | 2.5981196  | 6.8306E-23 | chr2  | 26670411  | 26670709  | + | 174  | -22153  | NM_002246.2    | 3777      | K2p3.1    | OAT    | protein-coding |                |
| KCNMB4      | 1.01634209 | 0.00036763 | chr12 | 70730853  | 70731094  | + | 41   | 364691  | NM_014505.5    | 27345     | -         |        | protein-coding |                |
| KCNQ5       | 0.60171382 | 0.03939492 | chr6  | 72421359  | 72421789  | + | 396  | -200269 | NM_001160133.1 | 56479     | Kv7.5     | MRD4   | protein-coding |                |
| KCNQ5       | 0.60171382 | 0.03939492 | chr6  | 72581041  | 72581253  | + | 69   | -40696  | NM_001160133.1 | 56479     | Kv7.5     | MRD4   | protein-coding |                |
| KCNQ5       | 0.60171382 | 0.03939492 | chr6  | 72500096  | 72500261  | + | 53   | -121665 | NM_001160133.1 | 56479     | Kv7.5     | MRD4   | protein-coding |                |
| KCNQ5       | 0.60171382 | 0.03939492 | chr6  | 72911563  | 72911778  | + | 44   | 289827  | NM_001160132.1 | 56479     | Kv7.5     | MRD4   | protein-coding |                |
| KCNQ5       | 0.60171382 | 0.03939492 | chr6  | 72640392  | 72640655  | + | 25   | 18680   | NM_001160132.1 | 56479     | Kv7.5     | MRD4   | protein-coding |                |
| KCNQ5       | 0.60171382 | 0.03939492 | chr6  | 72092413  | 72092564  | + | 16   | -529355 | NM_001160133.1 | 56479     | Kv7.5     | MRD4   | protein-coding |                |
| KDM5B       | 0.552328   | 0.01284764 | chr1  | 202762104 | 202762309 | + | 45   | 45082   | XM_011509092.2 | 10765     | CT31      | JARID1 | protein-coding |                |
| KLKB1       | 0.76615175 | 0.01123413 | chr4  | 186446385 | 186447478 | + | 440  | 208619  | XM_017008184.1 | 3818      | KLK3      | PKK    | Pt             | protein-coding |
| KLKB1       | 0.76615175 | 0.01123413 | chr4  | 186475042 | 186475547 | + | 383  | 236982  | XM_017008184.1 | 3818      | KLK3      | PKK    | Pt             | protein-coding |
| KLKB1       | 0.76615175 | 0.01123413 | chr4  | 186204160 | 186204517 | + | 57   | -11376  | XM_017008181.1 | 3818      | KLK3      | PKK    | Pt             | protein-coding |
| LAMA3       | 0.87993436 | 0.0026431  | chr18 | 23740181  | 23740523  | + | 53   | 50909   | XM_011525978.2 | 3909      | BM600     | E17    | protein-coding |                |
| LAMA3       | 0.87993436 | 0.0026431  | chr18 | 23701590  | 23701964  | + | 45   | 12334   | XM_011525978.2 | 3909      | BM600     | E17    | protein-coding |                |
| LDLRAD4     | 0.87696513 | 0.00156387 | chr18 | 13672513  | 13676741  | + | 2549 | 32869   | NM_001276251.1 | 753       | C18orf1   |        | protein-coding |                |
| LDLRAD4     | 0.87696513 | 0.00156387 | chr18 | 13464848  | 13465159  | + | 139  | -15257  | XM_017025969.1 | 753       | C18orf1   |        | protein-coding |                |
| LDLRAD4     | 0.87696513 | 0.00156387 | chr18 | 13664876  | 13665114  | + | 39   | 23237   | NM_001276251.1 | 753       | C18orf1   |        | protein-coding |                |
| LFNG        | 0.52902229 | 0.04199953 | chr7  | 2471523   | 2471807   | + | 128  | -40864  | NM_001166355.1 | 3955      | SCDO3     |        | protein-coding |                |
| LGALS3      | 1.02888558 | 8.1325E-06 | chr14 | 55107819  | 55107981  | + | 57   | -21317  | NM_001177388.1 | 3958      | CBP35     | GAL3   | protein-coding |                |
| LGALS3      | 1.02888558 | 8.1325E-06 | chr14 | 55108410  | 55108642  | + | 31   | -20691  | NM_001177388.1 | 3958      | CBP35     | GAL3   | protein-coding |                |
| LGALS3      | 1.02888558 | 8.1325E-06 | chr14 | 55102224  | 55102510  | + | 29   | -26850  | NM_001177388.1 | 3958      | CBP35     | GAL3   | protein-coding |                |
| LIN7A       | 0.80095514 | 0.00068777 | chr12 | 80607112  | 80608203  | + | 439  | 330252  | XM_011538928.2 | 8825      | LIN-7A    | LIN7   | protein-coding |                |
| LIN7A       | 0.80095514 | 0.00068777 | chr12 | 80605818  | 80606179  | + | 181  | 331911  | XM_011538928.2 | 8825      | LIN-7A    | LIN7   | protein-coding |                |
| LIN7A       | 0.80095514 | 0.00068777 | chr12 | 80599134  | 80599507  | + | 110  | 338589  | XM_011538928.2 | 8825      | LIN-7A    | LIN7   | protein-coding |                |
| LIN7A       | 0.80095514 | 0.00068777 | chr12 | 80841222  | 80841431  | + | 98   | 96583   | XM_011538928.2 | 8825      | LIN-7A    | LIN7   | protein-coding |                |
| LIN7A       | 0.80095514 | 0.00068777 | chr12 | 80847064  | 80847345  | + | 77   | 90705   | XM_011538928.2 | 8825      | LIN-7A    | LIN7   | protein-coding |                |
| LIN7A       | 0.80095514 | 0.00068777 | chr12 | 80551939  | 80552137  | + | 72   | 385871  | XM_011538928.2 | 8825      | LIN-7A    | LIN7   | protein-coding |                |
| LIN7A       | 0.80095514 | 0.00068777 | chr12 | 80580345  | 80580549  | + | 44   | 357462  | XM_011538928.2 | 8825      | LIN-7A    | LIN7   | protein-coding |                |
| LMOD1       | 2.56680084 | 3.6522E-21 | chr1  | 201924378 | 201924829 | + | 86   | 21985   | NM_012134.2    | 25802     | 1D 64kd   | D1     | protein-coding |                |
| LNPEP       | 0.63093359 | 0.01625025 | chr5  | 96934996  | 96936108  | + | 66   | -90     | NM_005575.2    | 4012      | CAP       | IRAP   | P              | protein-coding |
| OC107984104 | 0.65579707 | 0.02243154 | chr20 | 1850232   | 1851289   | + | 944  | -6722   | XM_017028189.1 | 107984104 | -         |        | protein-coding |                |
| OC107984104 | 0.65579707 | 0.02243154 | chr20 | 1802888   | 1803043   | + | 39   | 41073   | XM_017028191.1 | 107984104 | -         |        | protein-coding |                |
| OC10798676  | 1.21656343 | 2.7033E-05 | chr7  | 5634289   | 5634544   | + | 39   | -15181  | XM_017012909.1 | 107986762 | -         |        | protein-coding |                |
| OC10798728  | 1.63694438 | 1.2548E-13 | chr20 | 62739974  | 62740721  | + | 198  | -22140  | XM_017028199.1 | 107987285 | -         |        | protein-coding |                |
| OC10798728  | 1.63694438 | 1.2548E-13 | chr20 | 62735391  | 62735583  | + | 66   | -17280  | XM_017028199.1 | 107987285 | -         |        | protein-coding |                |
| OC10798728  | 1.63694438 | 1.2548E-13 | chr20 | 62734902  | 62735185  | + | 37   | -16836  | XM_017028199.1 | 107987285 | -         |        | protein-coding |                |
| LPAR1       | 0.67931315 | 3.1647E-05 | chr9  | 110977245 | 110978218 | + | 898  | 22085   | XM_017014404.1 | 1902      | EDG2      | GPR2   | protein-coding |                |
| LPAR1       | 0.67931315 | 3.1647E-05 | chr9  | 110892295 | 110893037 | + | 761  | 107150  | XM_017014404.1 | 1902      | EDG2      | GPR2   | protein-coding |                |
| LPAR1       | 0.67931315 | 3.1647E-05 | chr9  | 110777157 | 110777430 | + | 151  | 222523  | XM_017014404.1 | 1902      | EDG2      | GPR2   | protein-coding |                |
| LPAR1       | 0.67931315 | 3.1647E-05 | chr9  | 110891673 | 110892053 | + | 141  | 107953  | XM_017014404.1 | 1902      | EDG2      | GPR2   | protein-coding |                |
| LPAR1       | 0.67931315 | 3.1647E-05 | chr9  | 110995162 | 110995920 | + | 78   | 4275    | XM_017014404.1 | 1902      | EDG2      | GPR2   | protein-coding |                |
| LPAR1       | 0.67931315 | 3.1647E-05 | chr9  | 110932926 | 110933273 | + | 22   | 66717   | XM_017014404.1 | 1902      | EDG2      | GPR2   | protein-coding |                |
| LRFN5       | 0.74856848 | 0.01059949 | chr14 | 41807832  | 41809127  | + | 2300 | 80781   | XM_017021048.1 | 145581    | C14orf146 | F      | protein-coding |                |
| LRFN5       | 0.74856848 | 0.01059949 | chr14 | 42056595  | 42056998  | + | 369  | 329098  | XM_017021048.1 | 145581    | C14orf146 | F      | protein-coding |                |
| LRFN5       | 0.74856848 | 0.01059949 | chr14 | 41873266  | 41873609  | + | 194  | 145739  | XM_017021048.1 | 145581    | C14orf146 | F      | protein-coding |                |
| LRFN5       | 0.74856848 | 0.01059949 | chr14 | 41609896  | 41610161  | + | 151  | 2467    | NM_152447.3    | 145581    | C14orf146 | F      | protein-coding |                |
| LRFN5       | 0.74856848 | 0.01059949 | chr14 | 43019707  | 43020137  | + | 150  | 1292224 | XM_017021048.1 | 145581    | C14orf146 | F      | protein-coding |                |
| LRFN5       | 0.74856848 | 0.01059949 | chr14 | 42299631  | 42300147  | + | 125  | 572191  | XM_017021048.1 | 145581    | C14orf146 | F      | protein-coding |                |
| LRFN5       | 0.74856848 | 0.01059949 | chr14 | 42193210  | 42193401  | + | 90   | 465607  | XM_017021048.1 | 145581    | C14orf146 | F      | protein-coding |                |
| LRFN5       | 0.74856848 | 0.01059949 | chr14 | 41623816  | 41624003  | + | 82   | 16348   | NM_152447.3    | 145581    | C14orf146 | F      | protein-coding |                |
| LRFN5       | 0.74856848 | 0.01059949 | chr14 | 42734922  | 42735166  | + | 81   | 1007346 | XM_017021048.1 | 145581    | C14orf146 | F      | protein-coding |                |
| LRFN5       | 0.74856848 | 0.01059949 | chr14 | 42499196  | 42499398  | + | 51   | 771599  | XM_017021048.1 | 145581    | C14orf146 | F      | protein-coding |                |
| LRFN5       | 0.74856848 | 0.01059949 | chr14 | 41899525  | 41899683  | + | 49   | 171906  | XM_017021048.1 | 145581    | C14orf146 | F      | protein-coding |                |
| LRFN5       | 0.74856848 | 0.01059949 | chr14 | 42884224  | 42884423  | + | 40   | 1156625 | XM_017021048.1 | 145581    | C14orf146 | F      | protein-coding |                |
| LRFN5       | 0.74856848 | 0.01059949 | chr14 | 41873746  | 41874015  | + | 27   | 146182  | XM_017021048.1 | 145581    | C14orf146 | F      | protein-coding |                |
| LRFN5       | 0.74856848 | 0.01059949 | chr14 | 42316732  | 42316966  | + | 23   | 589151  | XM_017021048.1 | 145581    | C14orf146 | F      | protein-coding |                |
| LRFN5       | 0.74856848 | 0.01059949 | chr14 | 41607046  | 41607252  | + | 23   | -412    | NM_152447.3    | 145581    | C14orf146 | F      | protein-coding |                |
| LRRC27      | 0.57535356 | 0.03342743 | chr10 | 132364680 | 132364909 | + | 130  | 27685   | XM_011540210.2 | 80313     | -         |        | protein-coding |                |
| LRRC27      | 0.57535356 | 0.03342743 | chr10 | 132364300 | 132364565 | + | 87   | 27323   | XM_011540210.2 | 80313     | -         |        | protein-coding |                |
| MAP7D2      | 2.63603029 | 1.0313E-52 | chrX  | 20059481  | 20059958  | + | 328  | 56887   | XM_011545485.1 | 256714    | -         |        | protein-coding |                |
| MBD3L3      | 0.70418452 | 0.01871647 | chr19 | 7028572   | 7028754   | + | 31   | 29971   | NM_001164425.1 | 653657    | -         |        | protein-coding |                |
| MBOAT2      | 0.96463908 | 5.15E-06   | chr2  | 9054978   | 9056480   | + | 2533 | -51979  | NM_138799.3    | 129642    | LPAAT     | LPCA   | protein-coding |                |
| MBOAT2      | 0.96463908 | 5.15E-06   | chr2  | 9071317   | 9072102   | + | 314  | -67959  | NM_138799.3    | 129642    | LPAAT     | LPCA   | protein-coding |                |
| MBOAT2      | 0.96463908 | 5.15E-06   | chr2  | 9010965   | 9011212   | + | 86   | -7338   | NM_138799.3    | 129642    | LPAAT     | LPCA   | protein-coding |                |
| MDFI        | 0.61888182 | 0.00116023 | chr6  | 41643053  | 41643875  | + | 559  | 4485    | XM_017010867.1 | 4188      | I-MF      | I-mfa  | protein-coding |                |
| MDFI        | 0.61888182 | 0.00116023 | chr6  | 41640055  | 41640317  | + | 57   | 1207    | XM_017010867.1 | 4188      | I-MF      | I-mfa  | protein-coding |                |
| MDFI        | 0.61888182 | 0.00116023 | chr6  | 41644633  | 41644873  | + | 48   | 5774    | XM_017010867.1 | 4188      | I-MF      | I-mfa  | protein-coding |                |
| MDGA1       | 1.36194242 | 4.6397E-08 | chr6  | 37619244  | 37619395  | + | 22   | 77615   | XM_006715056.3 | 266727    | GPIM      | MAMI   | protein-coding |                |

|         |            |            |       |           |           |   |      |                        |                                   |
|---------|------------|------------|-------|-----------|-----------|---|------|------------------------|-----------------------------------|
| MDK     | 0.62986847 | 0.03342883 | chr11 | 46392686  | 46392986  | + | 57   | 11097 XM_017017764.1   | 4192 ARAP MK N protein-coding     |
| MDK     | 0.62986847 | 0.03342883 | chr11 | 46389538  | 46389788  | + | 23   | 7924 XM_017017764.1    | 4192 ARAP MK N protein-coding     |
| MEF2C   | 0.9666693  | 0.00102327 | chr5  | 88675649  | 88676159  | + | 328  | 148023 NM_001193349.1  | 4208 C5DELq14.3  protein-coding   |
| MEF2C   | 0.9666693  | 0.00102327 | chr5  | 88979182  | 88979692  | + | 245  | -75332 NM_001131005.2  | 4208 C5DELq14.3  protein-coding   |
| MMP3    | 0.92495811 | 1.7224E-06 | chr11 | 102929893 | 102931352 | + | 1558 | -86933 NM_002422.4     | 4314 CHDS6 MMF protein-coding     |
| MMP3    | 0.92495811 | 1.7224E-06 | chr11 | 102921696 | 102922405 | + | 749  | -78361 NM_002422.4     | 4314 CHDS6 MMF protein-coding     |
| MMP3    | 0.92495811 | 1.7224E-06 | chr11 | 102846627 | 102846841 | + | 85   | -3045 NM_002422.4      | 4314 CHDS6 MMF protein-coding     |
| MMP3    | 0.92495811 | 1.7224E-06 | chr11 | 102941053 | 102941216 | + | 19   | -97445 NM_002422.4     | 4314 CHDS6 MMF protein-coding     |
| MPP7    | 0.96583819 | 0.00063247 | chr10 | 28333455  | 28333673  | + | 39   | -30498 NM_001318170.1  | 143098 - protein-coding           |
| MRC2    | 0.66475585 | 0.01083884 | chr17 | 62633682  | 62634042  | + | 66   | 6192 XM_011525543.2    | 9902 CD280 CLEC; protein-coding   |
| MSI1    | 1.90118634 | 1.9884E-10 | chr12 | 120389665 | 120389878 | + | 106  | -20591 NM_002442.3     | 4440 - protein-coding             |
| MSRB2   | 0.85585505 | 0.00305487 | chr10 | 23156643  | 23157147  | + | 383  | 61331 XM_011519426.2   | 22921 CBS-1 CBS1 protein-coding   |
| MSRB2   | 0.85585505 | 0.00305487 | chr10 | 23100368  | 23100559  | + | 48   | 4899 XM_011519426.2    | 22921 CBS-1 CBS1 protein-coding   |
| MYADM   | 0.53520549 | 0.00215055 | chr19 | 53851804  | 53852031  | + | 57   | -13667 NM_001290193.1  | 91663 ST protein-coding           |
| MYBL1   | 1.02726936 | 0.0003749  | chr8  | 66555841  | 66556380  | + | 85   | 56680 XM_017013458.1   | 4603 A-MYB AMY protein-coding     |
| MYBL1   | 1.02726936 | 0.0003749  | chr8  | 66545714  | 66546094  | + | 66   | 66886 XM_017013458.1   | 4603 A-MYB AMY protein-coding     |
| MYBL1   | 1.02726936 | 0.0003749  | chr8  | 66560797  | 66561031  | + | 20   | 51876 XM_017013458.1   | 4603 A-MYB AMY protein-coding     |
| MYO18B  | 1.11267673 | 0.00018422 | chr22 | 25926950  | 25927159  | + | 86   | 141602 XM_017029016.1  | 84700 KFS4 protein-coding         |
| NAV1    | 0.75696531 | 0.00132614 | chr1  | 201597569 | 201597956 | + | 236  | -50560 NM_020443.4     | 89796 POMFIL3 ST protein-coding   |
| NAV1    | 0.75696531 | 0.00132614 | chr1  | 201636354 | 201636525 | + | 31   | -11883 NM_020443.4     | 89796 POMFIL3 ST protein-coding   |
| NDFIP2  | 0.92955638 | 0.00137468 | chr13 | 79802335  | 79802991  | + | 574  | 321539 NM_001161407.1  | 54602 N4WBP5A protein-coding      |
| NDFIP2  | 0.92955638 | 0.00137468 | chr13 | 79901246  | 79901560  | + | 172  | 420279 NM_001161407.1  | 54602 N4WBP5A protein-coding      |
| NDFIP2  | 0.92955638 | 0.00137468 | chr13 | 79806756  | 79807202  | + | 130  | 325855 NM_001161407.1  | 54602 N4WBP5A protein-coding      |
| NDFIP2  | 0.92955638 | 0.00137468 | chr13 | 79750253  | 79750625  | + | 129  | 269315 NM_001161407.1  | 54602 N4WBP5A protein-coding      |
| NDFIP2  | 0.92955638 | 0.00137468 | chr13 | 79805326  | 79805588  | + | 90   | 324333 NM_001161407.1  | 54602 N4WBP5A protein-coding      |
| NDFIP2  | 0.92955638 | 0.00137468 | chr13 | 79799188  | 79799360  | + | 71   | 318150 NM_001161407.1  | 54602 N4WBP5A protein-coding      |
| NDFIP2  | 0.92955638 | 0.00137468 | chr13 | 79659189  | 79659529  | + | 54   | 178235 NM_001161407.1  | 54602 N4WBP5A protein-coding      |
| NDFIP2  | 0.92955638 | 0.00137468 | chr13 | 79710262  | 79710822  | + | 45   | 229418 NM_001161407.1  | 54602 N4WBP5A protein-coding      |
| NDFIP2  | 0.92955638 | 0.00137468 | chr13 | 79898115  | 79898320  | + | 41   | 417093 NM_001161407.1  | 54602 N4WBP5A protein-coding      |
| NECTIN3 | 1.01531702 | 0.00048131 | chr3  | 110413810 | 110414189 | + | 106  | -657760 NM_015480.2    | 25945 CD113 CDW protein-coding    |
| NECTIN3 | 1.01531702 | 0.00048131 | chr3  | 110526849 | 110527231 | + | 90   | -544719 NM_015480.2    | 25945 CD113 CDW protein-coding    |
| NECTIN3 | 1.01531702 | 0.00048131 | chr3  | 110420213 | 110420466 | + | 77   | -651420 NM_015480.2    | 25945 CD113 CDW protein-coding    |
| NECTIN3 | 1.01531702 | 0.00048131 | chr3  | 110995506 | 110995751 | + | 45   | -76131 NM_015480.2     | 25945 CD113 CDW protein-coding    |
| NECTIN3 | 1.01531702 | 0.00048131 | chr3  | 110656590 | 110656844 | + | 39   | -415042 NM_015480.2    | 25945 CD113 CDW protein-coding    |
| NECTIN3 | 1.01531702 | 0.00048131 | chr3  | 109929887 | 109930148 | + | 39   | -1141742 NM_015480.2   | 25945 CD113 CDW protein-coding    |
| NEURL1  | 0.69938944 | 0.00976782 | chr10 | 103542973 | 103543124 | + | 19   | -12202 XM_005270269.3  | 9148 NEUR1 NEU protein-coding     |
| NOS1    | 1.05369674 | 0.00010981 | chr12 | 117328623 | 117328784 | + | 48   | -19293 NM_001204214.1  | 4842 IHPS1 N-NO protein-coding    |
| NOS1    | 1.05369674 | 0.00010981 | chr12 | 117261439 | 117261590 | + | 29   | 43538 NM_001204213.1   | 4842 IHPS1 N-NO protein-coding    |
| NOS1    | 1.05369674 | 0.00010981 | chr12 | 117322247 | 117322431 | + | 23   | -12929 NM_001204214.1  | 4842 IHPS1 N-NO protein-coding    |
| NOVA1   | 0.60230114 | 0.04256589 | chr14 | 28140483  | 28140779  | + | 139  | -1542877 NM_006491.2   | 4857 Nova-1 protein-coding        |
| NOVA1   | 0.60230114 | 0.04256589 | chr14 | 26776369  | 26776595  | + | 75   | -178728 NM_006491.2    | 4857 Nova-1 protein-coding        |
| NRPE    | 0.69687748 | 0.01225703 | chr5  | 112160683 | 112160906 | + | 128  | -183863 NM_001142475.1 | 9315 C5orf13 D45 protein-coding   |
| NRN1    | 0.96829583 | 0.00066703 | chr6  | 6538383   | 6538912   | + | 355  | -531042 NM_001278710.1 | 51299 NRN dj380B protein-coding   |
| NRN1    | 0.96829583 | 0.00066703 | chr6  | 6246437   | 6246915   | + | 239  | -239071 NM_001278710.1 | 51299 NRN dj380B protein-coding   |
| NRN1    | 0.96829583 | 0.00066703 | chr6  | 5671169   | 5671576   | + | 156  | 332672 NM_001278711.1  | 51299 NRN dj380B protein-coding   |
| NRN1    | 0.96829583 | 0.00066703 | chr6  | 6256933   | 6257398   | + | 151  | -249560 NM_001278710.1 | 51299 NRN dj380B protein-coding   |
| NRN1    | 0.96829583 | 0.00066703 | chr6  | 6386118   | 6386437   | + | 129  | -378672 NM_001278710.1 | 51299 NRN dj380B protein-coding   |
| NRN1    | 0.96829583 | 0.00066703 | chr6  | 5699126   | 5699462   | + | 56   | 304750 NM_001278711.1  | 51299 NRN dj380B protein-coding   |
| NRN1    | 0.96829583 | 0.00066703 | chr6  | 5695195   | 5695612   | + | 48   | 308641 NM_001278711.1  | 51299 NRN dj380B protein-coding   |
| NRN1    | 0.96829583 | 0.00066703 | chr6  | 6023011   | 6023282   | + | 31   | -15541 NM_001278710.1  | 51299 NRN dj380B protein-coding   |
| NRN1    | 0.96829583 | 0.00066703 | chr6  | 6386564   | 6386792   | + | 30   | -379073 NM_001278710.1 | 51299 NRN dj380B protein-coding   |
| NRN1    | 0.96829583 | 0.00066703 | chr6  | 5999631   | 5999821   | + | 23   | 4318 NM_001278711.1    | 51299 NRN dj380B protein-coding   |
| NRP1    | 0.87393255 | 0.00016711 | chr10 | 33930694  | 33931367  | + | 574  | -596125 NM_001244972.1 | 8829 BDCA4 CD3C protein-coding    |
| NRP1    | 0.87393255 | 0.00016711 | chr10 | 33313769  | 33314071  | + | 328  | 20759 XM_011519755.2   | 8829 BDCA4 CD3C protein-coding    |
| NRP1    | 0.87393255 | 0.00016711 | chr10 | 33314782  | 33315339  | + | 287  | 19619 XM_011519755.2   | 8829 BDCA4 CD3C protein-coding    |
| NRP1    | 0.87393255 | 0.00016711 | chr10 | 33732751  | 33733127  | + | 236  | -398034 NM_001244972.1 | 8829 BDCA4 CD3C protein-coding    |
| NRP1    | 0.87393255 | 0.00016711 | chr10 | 33164161  | 33164570  | + | 188  | 170314 XM_011519755.2  | 8829 BDCA4 CD3C protein-coding    |
| NRP1    | 0.87393255 | 0.00016711 | chr10 | 33273310  | 33273609  | + | 136  | 61220 XM_011519755.2   | 8829 BDCA4 CD3C protein-coding    |
| NRP1    | 0.87393255 | 0.00016711 | chr10 | 33334888  | 33335185  | + | 86   | -131 NM_001244972.1    | 8829 BDCA4 CD3C protein-coding    |
| NRP1    | 0.87393255 | 0.00016711 | chr10 | 33917445  | 33917786  | + | 66   | -582710 NM_001244972.1 | 8829 BDCA4 CD3C protein-coding    |
| NRP1    | 0.87393255 | 0.00016711 | chr10 | 33330606  | 33330816  | + | 53   | 3968 XM_011519755.2    | 8829 BDCA4 CD3C protein-coding    |
| NRP1    | 0.87393255 | 0.00016711 | chr10 | 33193469  | 33193634  | + | 48   | 141128 XM_011519755.2  | 8829 BDCA4 CD3C protein-coding    |
| NRP1    | 0.87393255 | 0.00016711 | chr10 | 33229714  | 33229951  | + | 36   | 104847 XM_011519755.2  | 8829 BDCA4 CD3C protein-coding    |
| NRP1    | 0.87393255 | 0.00016711 | chr10 | 33325912  | 33326286  | + | 33   | 8580 XM_011519755.2    | 8829 BDCA4 CD3C protein-coding    |
| NRP1    | 0.87393255 | 0.00016711 | chr10 | 33157194  | 33157377  | + | 30   | 177394 XM_011519755.2  | 8829 BDCA4 CD3C protein-coding    |
| NRP1    | 0.87393255 | 0.00016711 | chr10 | 33733311  | 33733491  | + | 23   | -398496 NM_001244972.1 | 8829 BDCA4 CD3C protein-coding    |
| NTSE    | 0.62208069 | 0.02772462 | chr6  | 85464197  | 85464559  | + | 261  | 14794 NM_002526.3      | 4907 CALJA CD73 protein-coding    |
| NTSE    | 0.62208069 | 0.02772462 | chr6  | 85403699  | 85404001  | + | 66   | -45734 NM_001204813.1  | 4907 CALJA CD73 protein-coding    |
| NTRK1   | 0.89348036 | 0.00227165 | chr1  | 156868925 | 156869202 | + | 151  | 8184 NM_002529.3       | 4914 MTC TRK TF protein-coding    |
| NUDT4   | 0.51340527 | 0.00924511 | chr12 | 93202379  | 93203611  | + | 1202 | -174928 NM_019094.5    | 11163 DIPP-2B DIP protein-coding  |
| NUDT4   | 0.51340527 | 0.00924511 | chr12 | 93318930  | 93319129  | + | 31   | -58894 NM_019094.5     | 11163 DIPP-2B DIP protein-coding  |
| NUDT4   | 0.51340527 | 0.00924511 | chr12 | 93377100  | 93377376  | + | 22   | -685 NM_019094.5       | 11163 DIPP-2B DIP protein-coding  |
| NXNL2   | 1.04449432 | 5.2124E-05 | chr9  | 88583905  | 88584979  | + | 1691 | 49341 NM_145283.2      | 158046 C9orf121 RC protein-coding |
| NXNL2   | 1.04449432 | 5.2124E-05 | chr9  | 88532101  | 88532580  | + | 76   | -2748 XM_011518276.2   | 158046 C9orf121 RC protein-coding |

|         |            |            |       |           |             |      |                         |                                   |
|---------|------------|------------|-------|-----------|-------------|------|-------------------------|-----------------------------------|
| NXNL2   | 1.04449432 | 5.2124E-05 | chr9  | 88746504  | 88746759 +  | 23   | 211530 NM_145283.2      | 158046 C9orf121 RC protein-coding |
| OLFM1   | 0.85241041 | 6.3821E-07 | chr9  | 135156508 | 135158188 + | 1029 | 69680 NM_001282611.1    | 10439 AMY NOE1 protein-coding     |
| OLFM1   | 0.85241041 | 6.3821E-07 | chr9  | 135196083 | 135196970 + | 383  | 108858 NM_001282611.1   | 10439 AMY NOE1 protein-coding     |
| OLFM1   | 0.85241041 | 6.3821E-07 | chr9  | 134992217 | 134992611 + | 139  | -82829 NM_014279.4      | 10439 AMY NOE1 protein-coding     |
| OLFM1   | 0.85241041 | 6.3821E-07 | chr9  | 135124381 | 135124793 + | 108  | 36919 NM_001282611.1    | 10439 AMY NOE1 protein-coding     |
| OLFM1   | 0.85241041 | 6.3821E-07 | chr9  | 135094840 | 135095258 + | 57   | 4381 NM_001282611.1     | 10439 AMY NOE1 protein-coding     |
| OLFM1   | 0.85241041 | 6.3821E-07 | chr9  | 135086278 | 135086493 + | 39   | -875 NM_001282612.1     | 10439 AMY NOE1 protein-coding     |
| OLFM2   | 1.52783123 | 9.9702E-29 | chr19 | 9944740   | 9945936 +   | 1202 | -8786 NM_058164.3       | 93145 NOE2 NOEL protein-coding    |
| OLFM2   | 1.52783123 | 9.9702E-29 | chr19 | 9901063   | 9901305 +   | 210  | 12521 NM_001304347.1    | 93145 NOE2 NOEL protein-coding    |
| OLFM2   | 1.52783123 | 9.9702E-29 | chr19 | 9934327   | 9934524 +   | 48   | 2127 NM_058164.3        | 93145 NOE2 NOEL protein-coding    |
| OPCML   | 1.4503717  | 4.2434E-07 | chr11 | 133015065 | 133015918 + | 1599 | -71723 NM_001319105.1   | 4978 IGLON1 OB protein-coding     |
| OPCML   | 1.4503717  | 4.2434E-07 | chr11 | 132685283 | 132685664 + | 148  | 258164 NM_001319103.1   | 4978 IGLON1 OB protein-coding     |
| OPCML   | 1.4503717  | 4.2434E-07 | chr11 | 132674257 | 132674488 + | 139  | 269265 NM_001319103.1   | 4978 IGLON1 OB protein-coding     |
| OPCML   | 1.4503717  | 4.2434E-07 | chr11 | 132902213 | 132902431 + | 57   | 41381 NM_001319103.1    | 4978 IGLON1 OB protein-coding     |
| OPCML   | 1.4503717  | 4.2434E-07 | chr11 | 132840457 | 132840772 + | 45   | 103023 NM_001319103.1   | 4978 IGLON1 OB protein-coding     |
| OSTC    | 0.62025557 | 0.00022854 | chr4  | 108674320 | 108675035 + | 253  | 24092 NM_001267818.1    | 58505 DC2 protein-coding          |
| OSTC    | 0.62025557 | 0.00022854 | chr4  | 108644324 | 108644629 + | 66   | -6109 NM_021227.3       | 58505 DC2 protein-coding          |
| PADI2   | 1.05947892 | 0.00025195 | chr1  | 17128252  | 17128917 +  | 423  | -9137 NM_007365.2       | 11240 PAD-H19 PA protein-coding   |
| PADI3   | 1.4801841  | 1.6573E-09 | chr1  | 17234869  | 17235582 +  | 605  | -13854 XM_011541572.2   | 51702 PAD3 PDI3  protein-coding   |
| PADI3   | 1.4801841  | 1.6573E-09 | chr1  | 17236702  | 17237249 +  | 106  | -12104 XM_011541572.2   | 51702 PAD3 PDI3  protein-coding   |
| PBX1    | 1.18183927 | 1.2459E-13 | chr1  | 164154701 | 164155776 + | 419  | -404122 XM_011509592.1  | 5087 CAKUHED protein-coding       |
| PBX1    | 1.18183927 | 1.2459E-13 | chr1  | 164663101 | 164663366 + | 128  | 103826 XM_005245229.3   | 5087 CAKUHED protein-coding       |
| PBX1    | 1.18183927 | 1.2459E-13 | chr1  | 164870168 | 164870371 + | 66   | 310862 XM_005245229.3   | 5087 CAKUHED protein-coding       |
| PCDH11X | 1.15278567 | 1.5645E-09 | chrX  | 92838877  | 92839646 +  | 1149 | 1003784 XM_017029419.1  | 27328 PCDH-X PCD protein-coding   |
| PCDH11X | 1.15278567 | 1.5645E-09 | chrX  | 92077171  | 92077911 +  | 593  | 242064 XM_017029419.1   | 27328 PCDH-X PCD protein-coding   |
| PCDH11X | 1.15278567 | 1.5645E-09 | chrX  | 92147772  | 92148088 +  | 139  | 312453 XM_017029419.1   | 27328 PCDH-X PCD protein-coding   |
| PCDH11X | 1.15278567 | 1.5645E-09 | chrX  | 91802830  | 91803107 +  | 67   | 23593 XM_011530910.1    | 27328 PCDH-X PCD protein-coding   |
| PCDH11X | 1.15278567 | 1.5645E-09 | chrX  | 91222588  | 91222858 +  | 66   | -556587 XM_011530912.2  | 27328 PCDH-X PCD protein-coding   |
| PCDH18  | 0.64965712 | 0.02857048 | chr4  | 137635395 | 137636016 + | 75   | -103175 XM_017008311.1  | 54510 PCDH68L protein-coding      |
| PCDH18  | 0.64965712 | 0.02857048 | chr4  | 136479330 | 136479510 + | 66   | 1053078 NM_019035.4     | 54510 PCDH68L protein-coding      |
| PCDH18  | 0.64965712 | 0.02857048 | chr4  | 137664017 | 137664592 + | 63   | -131774 XM_017008311.1  | 54510 PCDH68L protein-coding      |
| PCDH18  | 0.64965712 | 0.02857048 | chr4  | 136680360 | 136680591 + | 37   | 852023 NM_019035.4      | 54510 PCDH68L protein-coding      |
| PCYT1B  | 0.89932322 | 0.00132629 | chrX  | 24670014  | 24670241 +  | 86   | 2735 NM_001163264.1     | 9468 CCTB CTB protein-coding      |
| PDGFA   | 0.69634629 | 0.01865592 | chr7  | 362119    | 362797 +    | 275  | 155446 XM_011515419.2   | 5154 PDGF-A PDC protein-coding    |
| PHYH    | 0.57356261 | 0.02793797 | chr10 | 13302007  | 13302162 +  | 45   | -1954 NM_001323082.1    | 5264 LN1 LNAP1 protein-coding     |
| PIK3C2B | 0.72097669 | 0.0001529  | chr1  | 204453181 | 204453416 + | 166  | 15933 XM_017001475.1    | 5287 C2-PI3K protein-coding       |
| PIK3C3  | 0.80262994 | 0.00252283 | chr18 | 42274988  | 42276897 +  | 2179 | 320744 NM_002647.3      | 5289 VPS34 Vps3 protein-coding    |
| PIK3C3  | 0.80262994 | 0.00252283 | chr18 | 41936535  | 41937169 +  | 477  | -18344 XM_011526031.2   | 5289 VPS34 Vps3 protein-coding    |
| PIK3C3  | 0.80262994 | 0.00252283 | chr18 | 42310944  | 42311307 +  | 86   | 355927 NM_002647.3      | 5289 VPS34 Vps3 protein-coding    |
| PIK3C3  | 0.80262994 | 0.00252283 | chr18 | 42114048  | 42114237 +  | 72   | 158944 NM_002647.3      | 5289 VPS34 Vps3 protein-coding    |
| PIK3C3  | 0.80262994 | 0.00252283 | chr18 | 39668184  | 39668503 +  | 35   | -2286853 XM_011526031.2 | 5289 VPS34 Vps3 protein-coding    |
| PIK3C3  | 0.80262994 | 0.00252283 | chr18 | 39561291  | 39561460 +  | 22   | -2393821 XM_011526031.2 | 5289 VPS34 Vps3 protein-coding    |
| PIK3CG  | 0.59000992 | 0.02923    | chr7  | 106864822 | 106865626 + | 1326 | -54 NM_001282427.1      | 5294 PI3CG PI3K protein-coding    |
| PINK1   | 0.78944821 | 6.6953E-06 | chr1  | 20625976  | 20626244 +  | 341  | -7345 NM_032409.2       | 65018 BRPK PARK4 protein-coding   |
| PLA2G4C | 0.60401003 | 0.0150649  | chr19 | 48090361  | 48090565 +  | 57   | 20389 NM_001159323.1    | 8605 CPLA2-gamn protein-coding    |
| PLA2G4C | 0.60401003 | 0.0150649  | chr19 | 48029763  | 48029918 +  | 57   | 81012 NM_001159323.1    | 8605 CPLA2-gamn protein-coding    |
| PLA2G4C | 0.60401003 | 0.0150649  | chr19 | 48023091  | 48023275 +  | 23   | 87669 NM_001159323.1    | 8605 CPLA2-gamn protein-coding    |
| PLA2G4C | 0.60401003 | 0.0150649  | chr19 | 47950081  | 47950278 +  | 13   | 176673 NM_001159323.1   | 8605 CPLA2-gamn protein-coding    |
| PLCG2   | 0.93238417 | 0.00016967 | chr16 | 81730386  | 81730604 +  | 39   | -48763 NM_002661.4      | 5336 APLAID FCA protein-coding    |
| PLCG2   | 0.93238417 | 0.00016967 | chr16 | 81798970  | 81799168 +  | 23   | 19811 NM_002661.4       | 5336 APLAID FCA protein-coding    |
| PLXDC2  | 1.01073668 | 3.3716E-07 | chr10 | 20146057  | 20146696 +  | 2400 | 329933 NM_032812.8      | 84898 TEM7R protein-coding        |
| PLXDC2  | 1.01073668 | 3.3716E-07 | chr10 | 20013619  | 20014957 +  | 2318 | 197845 NM_032812.8      | 84898 TEM7R protein-coding        |
| PLXDC2  | 1.01073668 | 3.3716E-07 | chr10 | 20161622  | 20162670 +  | 1819 | 345703 NM_032812.8      | 84898 TEM7R protein-coding        |
| PLXDC2  | 1.01073668 | 3.3716E-07 | chr10 | 19931628  | 19932127 +  | 726  | 115434 NM_032812.8      | 84898 TEM7R protein-coding        |
| PLXDC2  | 1.01073668 | 3.3716E-07 | chr10 | 19785348  | 19785929 +  | 271  | -30577 XM_011519750.2   | 84898 TEM7R protein-coding        |
| PLXDC2  | 1.01073668 | 3.3716E-07 | chr10 | 19498515  | 19500012 +  | 206  | -316952 XM_011519750.2  | 84898 TEM7R protein-coding        |
| PLXDC2  | 1.01073668 | 3.3716E-07 | chr10 | 19816204  | 19816783 +  | 129  | 50 NM_032812.8          | 84898 TEM7R protein-coding        |
| PLXDC2  | 1.01073668 | 3.3716E-07 | chr10 | 19819498  | 19819724 +  | 98   | 3168 NM_032812.8        | 84898 TEM7R protein-coding        |
| PLXDC2  | 1.01073668 | 3.3716E-07 | chr10 | 19820437  | 19820604 +  | 86   | 4077 NM_032812.8        | 84898 TEM7R protein-coding        |
| PLXDC2  | 1.01073668 | 3.3716E-07 | chr10 | 20228528  | 20228772 +  | 84   | 412207 NM_032812.8      | 84898 TEM7R protein-coding        |
| PLXDC2  | 1.01073668 | 3.3716E-07 | chr10 | 19320497  | 19320900 +  | 70   | -495517 XM_011519750.2  | 84898 TEM7R protein-coding        |
| PLXDC2  | 1.01073668 | 3.3716E-07 | chr10 | 20233375  | 20233696 +  | 67   | 417092 NM_032812.8      | 84898 TEM7R protein-coding        |
| PLXDC2  | 1.01073668 | 3.3716E-07 | chr10 | 19719479  | 19719630 +  | 54   | -96661 XM_011519750.2   | 84898 TEM7R protein-coding        |
| PLXDC2  | 1.01073668 | 3.3716E-07 | chr10 | 19812490  | 19812850 +  | 32   | -3545 XM_011519750.2    | 84898 TEM7R protein-coding        |
| PLXDC2  | 1.01073668 | 3.3716E-07 | chr10 | 19256470  | 19256691 +  | 28   | -559635 XM_011519750.2  | 84898 TEM7R protein-coding        |
| PLXDC2  | 1.01073668 | 3.3716E-07 | chr10 | 20158084  | 20158354 +  | 25   | 341776 NM_032812.8      | 84898 TEM7R protein-coding        |
| PPP1R3B | 0.83332345 | 0.00049266 | chr8  | 9347212   | 9347907 +   | 440  | -195917 NM_001201329.1  | 79660 GL PPP1R4 protein-coding    |
| PPP1R3B | 0.83332345 | 0.00049266 | chr8  | 9190602   | 9191189 +   | 261  | -39253 NM_001201329.1   | 79660 GL PPP1R4 protein-coding    |
| PPP1R3B | 0.83332345 | 0.00049266 | chr8  | 9088511   | 9088890 +   | 106  | 61955 XM_006716253.3    | 79660 GL PPP1R4 protein-coding    |
| PPP1R3B | 0.83332345 | 0.00049266 | chr8  | 9189609   | 9189837 +   | 86   | -38081 NM_001201329.1   | 79660 GL PPP1R4 protein-coding    |
| PPP1R3B | 0.83332345 | 0.00049266 | chr8  | 9082154   | 9082526 +   | 69   | 68315 XM_006716253.3    | 79660 GL PPP1R4 protein-coding    |
| PPP1R3G | 2.8063057  | 9.7912E-20 | chr6  | 5053041   | 5053348 +   | 47   | -32292 NM_001145115.2   | 648791 - protein-coding           |
| PRELP   | 0.68894386 | 0.02183527 | chr1  | 203453663 | 203453925 + | 117  | -21961 NM_201348.1      | 5549 MST161 MS protein-coding     |
| PRELP   | 0.68894386 | 0.02183527 | chr1  | 203548168 | 203548343 + | 76   | 72500 NM_002725.3       | 5549 MST161 MS protein-coding     |



|         |            |            |       |           |           |   |      |          |                |        |             |                |
|---------|------------|------------|-------|-----------|-----------|---|------|----------|----------------|--------|-------------|----------------|
| PRELP   | 0.68894386 | 0.02183527 | chr1  | 203547818 | 203547987 | + | 23   | 72147    | NM_002725.3    | 5549   | MST161 MS   | protein-coding |
| PROM1   | 0.98976805 | 2.1175E-05 | chr4  | 16033124  | 16033495  | + | 66   | 15606    | XM_006713974.3 | 8842   | AC133 CD13  | protein-coding |
| PROM1   | 0.98976805 | 2.1175E-05 | chr4  | 16032568  | 16032796  | + | 45   | 16233    | XM_006713974.3 | 8842   | AC133 CD13  | protein-coding |
| PSEN2   | 1.19293067 | 4.4993E-11 | chr1  | 226844949 | 226845495 | + | 484  | -25350   | NM_000447.2    | 5664   | AD3L AD4 C  | protein-coding |
| PTGFR   | 1.24293458 | 1.8379E-06 | chr1  | 78420609  | 78421196  | + | 547  | -70072   | XM_017001873.1 | 5737   | FP          | protein-coding |
| RABL2A  | 0.63566128 | 0.00341294 | chr2  | 113583703 | 113584752 | + | 417  | -42991   | XM_017003211.1 | 11159  | -           | protein-coding |
| RABL2A  | 0.63566128 | 0.00341294 | chr2  | 113604025 | 113604463 | + | 151  | -22974   | XM_017003211.1 | 11159  | -           | protein-coding |
| RALGPS2 | 0.86854175 | 0.00061963 | chr1  | 178713039 | 178713222 | + | 66   | -12017   | NM_152663.4    | 55103  | dJ595C2.1   | protein-coding |
| RAP1GAP | 0.75153074 | 0.00101207 | chr1  | 21653267  | 21653687  | + | 151  | -1622    | NM_001145658.1 | 5909   | RAP1GA1 R   | protein-coding |
| RAP1GAP | 0.75153074 | 0.00101207 | chr1  | 21659211  | 21659362  | + | 31   | -7431    | NM_001145658.1 | 5909   | RAP1GA1 R   | protein-coding |
| RASGRF1 | 0.62596194 | 0.02121114 | chr15 | 79163472  | 79163835  | + | 440  | -72780   | NM_002891.4    | 5923   | CDC25 CDC2  | protein-coding |
| RASGRF1 | 0.62596194 | 0.02121114 | chr15 | 79185330  | 79185544  | + | 48   | -94564   | NM_002891.4    | 5923   | CDC25 CDC2  | protein-coding |
| RBMS3   | 0.9642282  | 0.00045248 | chr3  | 30034061  | 30035335  | + | 1871 | 303806   | XM_005265065.4 | 27303  | -           | protein-coding |
| RBMS3   | 0.9642282  | 0.00045248 | chr3  | 29335509  | 29336113  | + | 544  | 54499    | NM_001003793.2 | 27303  | -           | protein-coding |
| RBMS3   | 0.9642282  | 0.00045248 | chr3  | 29864716  | 29865062  | + | 290  | 133997   | XM_005265065.4 | 27303  | -           | protein-coding |
| RBMS3   | 0.9642282  | 0.00045248 | chr3  | 29758496  | 29759231  | + | 151  | 27971    | XM_005265065.4 | 27303  | -           | protein-coding |
| RBMS3   | 0.9642282  | 0.00045248 | chr3  | 29280784  | 29281322  | + | 139  | 193      | XM_017006178.1 | 27303  | -           | protein-coding |
| RBMS3   | 0.9642282  | 0.00045248 | chr3  | 29557813  | 29558133  | + | 126  | -140220  | XM_005265063.1 | 27303  | -           | protein-coding |
| RBMS3   | 0.9642282  | 0.00045248 | chr3  | 29642912  | 29643401  | + | 114  | -55037   | XM_005265063.1 | 27303  | -           | protein-coding |
| RBMS3   | 0.9642282  | 0.00045248 | chr3  | 29064143  | 29064403  | + | 99   | -216587  | XM_017006181.1 | 27303  | -           | protein-coding |
| RBMS3   | 0.9642282  | 0.00045248 | chr3  | 29347423  | 29347798  | + | 74   | 66298    | NM_001003793.2 | 27303  | -           | protein-coding |
| RBMS3   | 0.9642282  | 0.00045248 | chr3  | 29637052  | 29637279  | + | 73   | -61028   | XM_005265063.1 | 27303  | -           | protein-coding |
| RBMS3   | 0.9642282  | 0.00045248 | chr3  | 30131228  | 30131825  | + | 66   | 400634   | XM_005265065.4 | 27303  | -           | protein-coding |
| RBMS3   | 0.9642282  | 0.00045248 | chr3  | 30130855  | 30131095  | + | 45   | 400083   | XM_005265065.4 | 27303  | -           | protein-coding |
| RBMS3   | 0.9642282  | 0.00045248 | chr3  | 29441046  | 29441253  | + | 43   | 159837   | NM_001003793.2 | 27303  | -           | protein-coding |
| RBMS3   | 0.9642282  | 0.00045248 | chr3  | 30007689  | 30007919  | + | 38   | 276912   | XM_005265065.4 | 27303  | -           | protein-coding |
| RBMS3   | 0.9642282  | 0.00045248 | chr3  | 29430816  | 29430967  | + | 22   | 149579   | NM_001003793.2 | 27303  | -           | protein-coding |
| RBMS3   | 0.9642282  | 0.00045248 | chr3  | 30035817  | 30036042  | + | 20   | 305037   | XM_005265065.4 | 27303  | -           | protein-coding |
| RBMS3   | 0.9642282  | 0.00045248 | chr3  | 29764667  | 29764866  | + | 19   | 33874    | XM_005265065.4 | 27303  | -           | protein-coding |
| RBPMS   | 0.53329155 | 0.02831199 | chr8  | 30394278  | 30394730  | + | 198  | 9998     | XM_017012989.1 | 11030  | HERMES      | protein-coding |
| RET     | 1.44925405 | 1.0013E-12 | chr10 | 43019300  | 43019744  | + | 229  | -57547   | NM_020630.4    | 5979   | CDHF12 CDF  | protein-coding |
| RFTN1   | 0.83888002 | 0.00398615 | chr3  | 16481234  | 16481779  | + | 172  | 31405    | XM_005264986.2 | 23180  | MIG2 PIB10  | protein-coding |
| RFTN1   | 0.83888002 | 0.00398615 | chr3  | 16468612  | 16468830  | + | 48   | 44190    | XM_005264986.2 | 23180  | MIG2 PIB10  | protein-coding |
| RFTN1   | 0.83888002 | 0.00398615 | chr3  | 16535819  | 16536070  | + | 25   | -22229   | NM_015150.1    | 23180  | MIG2 PIB10  | protein-coding |
| RGMA    | 0.95870985 | 0.00064557 | chr15 | 94607164  | 94607611  | + | 151  | -1518173 | NM_020211.2    | 56963  | RGM         | protein-coding |
| RGMA    | 0.95870985 | 0.00064557 | chr15 | 94125133  | 94125456  | + | 150  | -1036080 | NM_020211.2    | 56963  | RGM         | protein-coding |
| RGMA    | 0.95870985 | 0.00064557 | chr15 | 94070389  | 94070813  | + | 94   | -981387  | NM_020211.2    | 56963  | RGM         | protein-coding |
| RGMA    | 0.95870985 | 0.00064557 | chr15 | 94083653  | 94084115  | + | 89   | -994670  | NM_020211.2    | 56963  | RGM         | protein-coding |
| RGMA    | 0.95870985 | 0.00064557 | chr15 | 94322698  | 94322849  | + | 23   | -1233559 | NM_020211.2    | 56963  | RGM         | protein-coding |
| RGS10   | 0.7182325  | 0.00245289 | chr10 | 119395479 | 119395674 | + | 57   | 140957   | NM_002925.3    | 6001   | -           | protein-coding |
| RG54    | 0.8236476  | 1.7659E-05 | chr1  | 163055130 | 163055846 | + | 151  | -13118   | NM_001102445.2 | 5999   | RGPA SCZDE  | protein-coding |
| RG54    | 0.8236476  | 1.7659E-05 | chr1  | 163105024 | 163105230 | + | 123  | 33222    | NM_001113380.1 | 5999   | RGPA SCZDE  | protein-coding |
| RG54    | 0.8236476  | 1.7659E-05 | chr1  | 163084503 | 163084712 | + | 70   | 12702    | NM_001113380.1 | 5999   | RGPA SCZDE  | protein-coding |
| RG54    | 0.8236476  | 1.7659E-05 | chr1  | 162984794 | 162984964 | + | 53   | -83727   | NM_001102445.2 | 5999   | RGPA SCZDE  | protein-coding |
| RG55    | 0.58273779 | 0.04908912 | chr1  | 163321674 | 163321997 | + | 274  | -44      | NM_001254748.1 | 8490   | MST092 MS   | protein-coding |
| RG55    | 0.58273779 | 0.04908912 | chr1  | 163178622 | 163178990 | + | 127  | 24367    | NM_001254749.1 | 8490   | MST092 MS   | protein-coding |
| RG55    | 0.58273779 | 0.04908912 | chr1  | 163168095 | 163168390 | + | 116  | 34931    | NM_001254749.1 | 8490   | MST092 MS   | protein-coding |
| RG55    | 0.58273779 | 0.04908912 | chr1  | 163166583 | 163167227 | + | 94   | 36268    | NM_001254749.1 | 8490   | MST092 MS   | protein-coding |
| RHCG    | 1.89440765 | 1.115E-15  | chr15 | 89474379  | 89475486  | + | 1184 | 21651    | NM_001321041.1 | 51458  | C15orf6 PDR | protein-coding |
| RND3    | 0.65330306 | 0.02286383 | chr2  | 150203993 | 150204225 | + | 96   | 283586   | NM_005168.4    | 390    | ARHE Rho8   | protein-coding |
| RNF150  | 1.55058871 | 3.3658E-09 | chr4  | 141082061 | 141082495 | + | 242  | 27644    | XM_011532147.2 | 57484  | -           | protein-coding |
| RNF150  | 1.55058871 | 3.3658E-09 | chr4  | 141126942 | 141127093 | + | 39   | 5893     | XM_005263150.4 | 57484  | -           | protein-coding |
| RNF175  | 0.651078   | 0.00952049 | chr4  | 153731427 | 153731980 | + | 611  | -1472    | XM_005262940.4 | 285533 | -           | protein-coding |
| RNF216  | 1.19374525 | 5.315E-15  | chr7  | 5781696   | 5781923   | + | 23   | -79      | NM_207116.2    | 54476  | CAHH TRIAD  | protein-coding |
| RNF7    | 0.60877943 | 0.00025751 | chr3  | 141738058 | 141738256 | + | 48   | -52      | NM_001201370.1 | 9616   | CKBBP1 RO   | protein-coding |
| RSPH1   | 0.69713831 | 0.01774328 | chr21 | 42465083  | 42465474  | + | 151  | 30923    | XM_005261208.2 | 89765  | CT79 RSP44  | protein-coding |
| RSPH1   | 0.69713831 | 0.01774328 | chr21 | 42425036  | 42425756  | + | 128  | 70805    | XM_005261208.2 | 89765  | CT79 RSP44  | protein-coding |
| RUNX3   | 1.14648476 | 4.6835E-07 | chr1  | 25074359  | 25074665  | + | 151  | -109354  | XM_005246024.4 | 864    | AML2 CBFA:  | protein-coding |
| RUNX3   | 1.14648476 | 4.6835E-07 | chr1  | 25022455  | 25022606  | + | 48   | -57372   | XM_005246024.4 | 864    | AML2 CBFA:  | protein-coding |
| RYBP    | 0.78300463 | 0.00081003 | chr3  | 72280222  | 72280570  | + | 223  | 166227   | NM_012234.6    | 23429  | AAP1 APAP:  | protein-coding |
| RYBP    | 0.78300463 | 0.00081003 | chr3  | 72624763  | 72624971  | + | 128  | -178244  | NM_012234.6    | 23429  | AAP1 APAP:  | protein-coding |
| RYBP    | 0.78300463 | 0.00081003 | chr3  | 72502278  | 72502461  | + | 106  | -55746   | NM_012234.6    | 23429  | AAP1 APAP:  | protein-coding |
| RYBP    | 0.78300463 | 0.00081003 | chr3  | 72309768  | 72309958  | + | 48   | 136760   | NM_012234.6    | 23429  | AAP1 APAP:  | protein-coding |
| RYBP    | 0.78300463 | 0.00081003 | chr3  | 72425860  | 72426038  | + | 31   | 20674    | NM_012234.6    | 23429  | AAP1 APAP:  | protein-coding |
| RYBP    | 0.78300463 | 0.00081003 | chr3  | 72379832  | 72379983  | + | 31   | 66716    | NM_012234.6    | 23429  | AAP1 APAP:  | protein-coding |
| SCN4B   | 0.95181666 | 0.00060587 | chr11 | 118048455 | 118048682 | + | 96   | 96901    | NM_001142349.1 | 6330   | ATFB17 LQT  | protein-coding |
| SCN4B   | 0.95181666 | 0.00060587 | chr11 | 118252011 | 118252461 | + | 87   | -99321   | NM_001142348.1 | 6330   | ATFB17 LQT  | protein-coding |
| SDK1    | 1.33563331 | 2.7135E-14 | chr7  | 3321375   | 3322272   | + | 574  | 20375    | NM_152744.3    | 221935 | -           | protein-coding |
| SDK1    | 1.33563331 | 2.7135E-14 | chr7  | 3671412   | 3671972   | + | 314  | -280102  | XM_011515189.1 | 221935 | -           | protein-coding |
| SDK1    | 1.33563331 | 2.7135E-14 | chr7  | 4083580   | 4083824   | + | 174  | -45983   | NM_001079653.1 | 221935 | -           | protein-coding |
| SDK1    | 1.33563331 | 2.7135E-14 | chr7  | 3747541   | 3747738   | + | 45   | -204155  | XM_011515189.1 | 221935 | -           | protein-coding |
| SDK1    | 1.33563331 | 2.7135E-14 | chr7  | 3592057   | 3592208   | + | 39   | 290684   | NM_152744.3    | 221935 | -           | protein-coding |
| SDS     | 0.64587718 | 0.03122413 | chr12 | 113396192 | 113396678 | + | 287  | 7452     | NM_006843.2    | 10993  | SDH         | protein-coding |
| SEC22A  | 0.66032715 | 0.00086122 | chr3  | 123151567 | 123152296 | + | 1452 | -49996   | NM_012430.4    | 26984  | SEC22L2     | protein-coding |

|          |            |            |       |           |           |   |      |                        |                    |                |
|----------|------------|------------|-------|-----------|-----------|---|------|------------------------|--------------------|----------------|
| SEMA3D   | 0.80573812 | 0.005544   | chr7  | 85078023  | 85078795  | + | 984  | 28337 XM_011515961.2   | 223117 Sema-Z2 col | protein-coding |
| SEMA3D   | 0.80573812 | 0.005544   | chr7  | 84981305  | 84981550  | + | 90   | 125319 XM_011515961.2  | 223117 Sema-Z2 col | protein-coding |
| SEMA3D   | 0.80573812 | 0.005544   | chr7  | 85091087  | 85091257  | + | 76   | 15574 XM_011515961.2   | 223117 Sema-Z2 col | protein-coding |
| SEMA3D   | 0.80573812 | 0.005544   | chr7  | 85185725  | 85186030  | + | 48   | 978 XM_011515960.1     | 223117 Sema-Z2 col | protein-coding |
| SEMA5B   | 4.40187105 | 1.0038E-64 | chr3  | 122944932 | 122945178 | + | 86   | 31079 NM_001256347.1   | 54437 SEMAG Serr   | protein-coding |
| SEMA5B   | 4.40187105 | 1.0038E-64 | chr3  | 122982324 | 122982479 | + | 31   | -6267 NM_001256347.1   | 54437 SEMAG Serr   | protein-coding |
| SEMA6A   | 2.41314267 | 2.3428E-29 | chr5  | 116717013 | 116717560 | + | 504  | -142360 NM_001300780.1 | 57556 HT018 SEM/   | protein-coding |
| SEMA6A   | 2.41314267 | 2.3428E-29 | chr5  | 116688067 | 116688421 | + | 248  | -113318 NM_001300780.1 | 57556 HT018 SEM/   | protein-coding |
| SEMA6A   | 2.41314267 | 2.3428E-29 | chr5  | 116654871 | 116655377 | + | 119  | -80198 NM_001300780.1  | 57556 HT018 SEM/   | protein-coding |
| SEMA6A   | 2.41314267 | 2.3428E-29 | chr5  | 116574779 | 116575007 | + | 106  | 33 NM_020796.4         | 57556 HT018 SEM/   | protein-coding |
| SERPING1 | 1.98094701 | 1.4975E-19 | chr11 | 57623161  | 57623392  | + | 29   | 25044 NM_001032295.1   | 710 C1IN C1INH     | protein-coding |
| SEZ6L    | 2.56787885 | 3.2001E-22 | chr22 | 26016708  | 26017568  | + | 1219 | -152336 NM_001184775.1 | 23544 -            | protein-coding |
| SEZ6L    | 2.56787885 | 3.2001E-22 | chr22 | 26121640  | 26122372  | + | 534  | -47468 NM_001184775.1  | 23544 -            | protein-coding |
| SEZ6L    | 2.56787885 | 3.2001E-22 | chr22 | 26291909  | 26292259  | + | 186  | 122586 XM_005261439.3  | 23544 -            | protein-coding |
| SGIP1    | 1.08565609 | 6.9809E-05 | chr1  | 66548978  | 66549567  | + | 699  | 15138 XM_017002521.1   | 84251 -            | protein-coding |
| SH3D21   | 1.82864778 | 4.7179E-13 | chr1  | 36300022  | 36300208  | + | 63   | -6233 XM_017002345.1   | 79729 C1orf113     | protein-coding |
| SH3GL3   | 1.01206464 | 0.00035658 | chr15 | 83890514  | 83891094  | + | 359  | 379185 XM_017022486.1  | 6457 CNSA3 EEN-    | protein-coding |
| SH3GL3   | 1.01206464 | 0.00035658 | chr15 | 83459849  | 83460302  | + | 76   | 12847 NM_003027.4      | 6457 CNSA3 EEN-    | protein-coding |
| SH3GL3   | 1.01206464 | 0.00035658 | chr15 | 83848253  | 83848470  | + | 31   | 336742 XM_017022486.1  | 6457 CNSA3 EEN-    | protein-coding |
| SH3PXD2A | 0.6259297  | 0.00013488 | chr10 | 103795584 | 103796433 | + | 1184 | 59398 NM_014631.2      | 9644 FISH SH3MC    | protein-coding |
| SIGLEC15 | 3.41389968 | 4.9718E-38 | chr18 | 45825281  | 45825486  | + | 57   | -197 NM_213602.2       | 284266 CD33L3 HsT: | protein-coding |
| SIGLEC15 | 3.41389968 | 4.9718E-38 | chr18 | 45589530  | 45589698  | + | 23   | -235966 NM_213602.2    | 284266 CD33L3 HsT: | protein-coding |
| SIPA1L1  | 0.50113473 | 0.01721409 | chr14 | 71693464  | 71693774  | + | 139  | 96220 XM_011536638.2   | 26037 E6TP1 SPAR   | protein-coding |
| SIPA1L1  | 0.50113473 | 0.01721409 | chr14 | 71692473  | 71692757  | + | 66   | 95216 XM_011536638.2   | 26037 E6TP1 SPAR   | protein-coding |
| SIPA1L1  | 0.50113473 | 0.01721409 | chr14 | 71711752  | 71711912  | + | 63   | 114433 XM_011536638.2  | 26037 E6TP1 SPAR   | protein-coding |
| SIPA1L1  | 0.50113473 | 0.01721409 | chr14 | 71651341  | 71651579  | + | 61   | 54061 XM_011536638.2   | 26037 E6TP1 SPAR   | protein-coding |
| SIPA1L1  | 0.50113473 | 0.01721409 | chr14 | 71591950  | 71592268  | + | 49   | 4538 NM_001284247.1    | 26037 E6TP1 SPAR   | protein-coding |
| SIPA1L1  | 0.50113473 | 0.01721409 | chr14 | 71666712  | 71666900  | + | 28   | 69407 XM_011536638.2   | 26037 E6TP1 SPAR   | protein-coding |
| SIPA1L1  | 0.50113473 | 0.01721409 | chr14 | 71650543  | 71650789  | + | 19   | 53267 XM_011536638.2   | 26037 E6TP1 SPAR   | protein-coding |
| SIRPA    | 0.89525094 | 5.719E-05  | chr20 | 1952844   | 1953683   | + | 2498 | 38955 XM_011529173.2   | 140885 BIT CD172A  | protein-coding |
| SIRPA    | 0.89525094 | 5.719E-05  | chr20 | 1948573   | 1949050   | + | 274  | 34503 XM_011529173.2   | 140885 BIT CD172A  | protein-coding |
| SIRPA    | 0.89525094 | 5.719E-05  | chr20 | 1954505   | 1954791   | + | 248  | 40340 XM_011529173.2   | 140885 BIT CD172A  | protein-coding |
| SIRPA    | 0.89525094 | 5.719E-05  | chr20 | 1959130   | 1959668   | + | 236  | 45091 XM_011529173.2   | 140885 BIT CD172A  | protein-coding |
| SIRPA    | 0.89525094 | 5.719E-05  | chr20 | 1965493   | 1965827   | + | 39   | 51352 XM_011529173.2   | 140885 BIT CD172A  | protein-coding |
| SIRPA    | 0.89525094 | 5.719E-05  | chr20 | 1951941   | 1952158   | + | 37   | 37741 XM_011529173.2   | 140885 BIT CD172A  | protein-coding |
| SIRPA    | 0.89525094 | 5.719E-05  | chr20 | 1900349   | 1900519   | + | 23   | 5234 XM_006723545.3    | 140885 BIT CD172A  | protein-coding |
| SLC16A2  | 0.55219229 | 0.03501611 | chrX  | 74222567  | 74222739  | + | 174  | -198840 NM_006517.4    | 6567 AHDS DXS12    | protein-coding |
| SLC17A7  | 1.3298037  | 3.2181E-12 | chr19 | 49443556  | 49444218  | + | 48   | -2336 NM_020309.3      | 57030 BNPI VGLUT1  | protein-coding |
| SLC1A4   | 0.55135673 | 0.0474973  | chr2  | 64987712  | 64988613  | + | 499  | -283 NM_001193493.1    | 65009 ASCT1 SATT   | protein-coding |
| SLC1A4   | 0.55135673 | 0.0474973  | chr2  | 64917804  | 64917987  | + | 16   | -70550 NM_001193493.1  | 65009 ASCT1 SATT   | protein-coding |
| SLC35F2  | 0.72092536 | 0.01223691 | chr11 | 107856767 | 107857505 | + | 369  | 2052 NM_017515.4       | 54733 HSNOV1       | protein-coding |
| SLC35F2  | 0.72092536 | 0.01223691 | chr11 | 107840334 | 107841139 | + | 151  | 18452 NM_017515.4      | 54733 HSNOV1       | protein-coding |
| SLC35F2  | 0.72092536 | 0.01223691 | chr11 | 107858718 | 107859098 | + | 48   | 280 NM_017515.4        | 54733 HSNOV1       | protein-coding |
| SLC35F2  | 0.72092536 | 0.01223691 | chr11 | 107842077 | 107842417 | + | 39   | 16941 NM_017515.4      | 54733 HSNOV1       | protein-coding |
| SLC35F2  | 0.72092536 | 0.01223691 | chr11 | 107859268 | 107859419 | + | 31   | -155 NM_017515.4       | 54733 HSNOV1       | protein-coding |
| SLC43A1  | 0.86957735 | 0.00295387 | chr11 | 57509659  | 57509838  | + | 85   | 4299 XM_011545322.1    | 8501 LAT3 PB39     | protein-coding |
| SLC46A3  | 0.83926098 | 0.00159927 | chr13 | 28743766  | 28744491  | + | 174  | -25115 NM_001135919.1  | 283537 FKSG16      | protein-coding |
| SLC46A3  | 0.83926098 | 0.00159927 | chr13 | 28753350  | 28753797  | + | 53   | -34560 NM_001135919.1  | 283537 FKSG16      | protein-coding |
| SLC46A3  | 0.83926098 | 0.00159927 | chr13 | 29133823  | 29134044  | + | 31   | -414920 NM_001135919.1 | 283537 FKSG16      | protein-coding |
| SLITRK3  | 1.5331904  | 5.4245E-08 | chr3  | 163468201 | 163469393 | + | 1108 | 1727205 NM_001318810.1 | 22865 -            | protein-coding |
| SLITRK3  | 1.5331904  | 5.4245E-08 | chr3  | 163611718 | 163612618 | + | 1078 | 1583834 NM_001318810.1 | 22865 -            | protein-coding |
| SLITRK3  | 1.5331904  | 5.4245E-08 | chr3  | 165265248 | 165265744 | + | 317  | -68387 NM_001318811.1  | 22865 -            | protein-coding |
| SLITRK3  | 1.5331904  | 5.4245E-08 | chr3  | 163592208 | 163592538 | + | 35   | 1603629 NM_001318810.1 | 22865 -            | protein-coding |
| SMR3B    | 1.17464726 | 4.2222E-05 | chr4  | 70380520  | 70381025  | + | 117  | -2306 NM_006685.3      | 10879 P-B PBII PR  | protein-coding |
| SMR3B    | 1.17464726 | 4.2222E-05 | chr4  | 70473442  | 70473876  | + | 106  | 90581 NM_006685.3      | 10879 P-B PBII PR  | protein-coding |
| SMR3B    | 1.17464726 | 4.2222E-05 | chr4  | 70382825  | 70382991  | + | 25   | -170 NM_006685.3       | 10879 P-B PBII PR  | protein-coding |
| SNTG2    | 2.13885565 | 1.3738E-21 | chr2  | 1162734   | 1163961   | + | 2749 | 1201 XM_017004373.1    | 54221 G2SYN SYN!   | protein-coding |
| SNTG2    | 2.13885565 | 1.3738E-21 | chr2  | 855322    | 855517    | + | 96   | -95449 NM_018968.3     | 54221 G2SYN SYN!   | protein-coding |
| SOX11    | 1.10037419 | 8.537E-08  | chr2  | 5250444   | 5250989   | + | 410  | -441951 NM_003108.3    | 6664 MRD27         | protein-coding |
| SOX11    | 1.10037419 | 8.537E-08  | chr2  | 4762540   | 4763287   | + | 358  | -929754 NM_003108.3    | 6664 MRD27         | protein-coding |
| SOX11    | 1.10037419 | 8.537E-08  | chr2  | 5249760   | 5250109   | + | 338  | -442733 NM_003108.3    | 6664 MRD27         | protein-coding |
| SOX11    | 1.10037419 | 8.537E-08  | chr2  | 6184207   | 6184609   | + | 210  | 491741 NM_003108.3     | 6664 MRD27         | protein-coding |
| SOX11    | 1.10037419 | 8.537E-08  | chr2  | 5077559   | 5078032   | + | 105  | -614872 NM_003108.3    | 6664 MRD27         | protein-coding |
| SOX11    | 1.10037419 | 8.537E-08  | chr2  | 5834393   | 5834804   | + | 80   | 141931 NM_003108.3     | 6664 MRD27         | protein-coding |
| SOX11    | 1.10037419 | 8.537E-08  | chr2  | 4745480   | 4745804   | + | 70   | -947025 NM_003108.3    | 6664 MRD27         | protein-coding |
| SOX11    | 1.10037419 | 8.537E-08  | chr2  | 5695727   | 5696035   | + | 66   | 3214 NM_003108.3       | 6664 MRD27         | protein-coding |
| SOX11    | 1.10037419 | 8.537E-08  | chr2  | 5058031   | 5058184   | + | 54   | -634560 NM_003108.3    | 6664 MRD27         | protein-coding |
| SOX13    | 0.76936113 | 0.00025044 | chr1  | 204044532 | 204044817 | + | 151  | -28422 XM_005245623.2  | 9580 ICA12 Sox-1   | protein-coding |
| SPEF2    | 1.24581045 | 4.5158E-06 | chr5  | 35664539  | 35665390  | + | 380  | 47077 NM_144722.3      | 79925 CT122 KPL2   | protein-coding |
| SPHKAP   | 0.77006517 | 0.00759524 | chr2  | 228189804 | 228190050 | + | 274  | -7928 XM_006712777.3   | 80309 SKIP         | protein-coding |
| SPHKAP   | 0.77006517 | 0.00759524 | chr2  | 228082421 | 228083030 | + | 248  | 98920 NM_030623.3      | 80309 SKIP         | protein-coding |
| SPHKAP   | 0.77006517 | 0.00759524 | chr2  | 228133955 | 228134389 | + | 161  | 47473 NM_030623.3      | 80309 SKIP         | protein-coding |
| SPHKAP   | 0.77006517 | 0.00759524 | chr2  | 228180205 | 228180382 | + | 96   | 1352 NM_030623.3       | 80309 SKIP         | protein-coding |
| SPHKAP   | 0.77006517 | 0.00759524 | chr2  | 228056470 | 228057021 | + | 47   | 124900 NM_030623.3     | 80309 SKIP         | protein-coding |

|          |            |             |       |           |           |   |      |                        |                    |                |
|----------|------------|-------------|-------|-----------|-----------|---|------|------------------------|--------------------|----------------|
| SPHKAP   | 0.77006517 | 0.00759524  | chr2  | 228599395 | 228599626 | + | 39   | -417511 XM_006712777.3 | 80309 SKIP         | protein-coding |
| STAMBPL1 | 0.56423673 | 0.01088207  | chr10 | 88882353  | 88882981  | + | 149  | 652 XM_011539985.1     | 57559 ALMalpha A   | protein-coding |
| STAMBPL1 | 0.56423673 | 0.01088207  | chr10 | 88883458  | 88883749  | + | 53   | 1588 XM_011539985.1    | 57559 ALMalpha A   | protein-coding |
| STXB     | 0.65194778 | 0.03142353  | chr16 | 31013314  | 31013493  | + | 119  | -2765 NM_052874.4      | 112755 GEFSP9 STX  | protein-coding |
| SULF2    | 1.84295589 | 0.90562E-10 | chr20 | 48199175  | 48199406  | + | 23   | -412661 XM_006723828.1 | 55959 HSULF-2      | protein-coding |
| SULT1B1  | 0.88872657 | 0.00278087  | chr4  | 69728470  | 69728916  | + | 229  | 31947 XM_005265678.3   | 27284 ST1B1 ST1B   | protein-coding |
| SULT1B1  | 0.88872657 | 0.00278087  | chr4  | 69731934  | 69732095  | + | 23   | 28626 XM_005265678.3   | 27284 ST1B1 ST1B   | protein-coding |
| SV2B     | 1.7880793  | 2.3929E-10  | chr15 | 91080934  | 91081425  | + | 198  | -18409 NM_001323031.1  | 9899 HsT19680      | protein-coding |
| SV2B     | 1.7880793  | 2.3929E-10  | chr15 | 91536901  | 91537346  | + | 161  | 312011 XM_005254998.3  | 9899 HsT19680      | protein-coding |
| SYNPR    | 1.05205024 | 3.9351E-06  | chr3  | 63270601  | 63271322  | + | 1132 | -7277 XM_017005732.1   | 132204 SPO         | protein-coding |
| SYNPR    | 1.05205024 | 3.9351E-06  | chr3  | 63386346  | 63386797  | + | 528  | -56506 NM_144642.4     | 132204 SPO         | protein-coding |
| SYNPR    | 1.05205024 | 3.9351E-06  | chr3  | 63343725  | 63344134  | + | 186  | 65691 NM_001130003.1   | 132204 SPO         | protein-coding |
| SYNPR    | 1.05205024 | 3.9351E-06  | chr3  | 63408171  | 63408346  | + | 31   | -34819 NM_144642.4     | 132204 SPO         | protein-coding |
| TCERG1L  | 0.51102245 | 0.00647882  | chr10 | 131332756 | 13133219  | + | 423  | 61242 NM_174937.3      | 256536 -           | protein-coding |
| TCERG1L  | 0.51102245 | 0.00647882  | chr10 | 131346854 | 131347245 | + | 46   | -35328 NM_174937.3     | 256536 -           | protein-coding |
| TCERG1L  | 0.51102245 | 0.00647882  | chr10 | 131332291 | 131332678 | + | 30   | -20763 NM_174937.3     | 256536 -           | protein-coding |
| TCL1B    | 0.94568444 | 0.00096433  | chr14 | 95738632  | 95739360  | + | 1654 | 52579 NM_004918.3      | 9623 SYN-1 TML1    | protein-coding |
| TFAP2A   | 1.59141447 | 1.0975E-10  | chr6  | 9795930   | 9796375   | + | 355  | 616222 NM_001032280.2  | 7020 AP-2 AP-2a    | protein-coding |
| TFAP2A   | 1.59141447 | 1.0975E-10  | chr6  | 10248466  | 10248799  | + | 293  | 163742 NM_001032280.2  | 7020 AP-2 AP-2a    | protein-coding |
| TFAP2A   | 1.59141447 | 1.0975E-10  | chr6  | 9554795   | 9555227   | + | 150  | 857363 NM_001032280.2  | 7020 AP-2 AP-2a    | protein-coding |
| TFAP2A   | 1.59141447 | 1.0975E-10  | chr6  | 10359682  | 10359916  | + | 96   | 52575 NM_001032280.2   | 7020 AP-2 AP-2a    | protein-coding |
| TFAP2A   | 1.59141447 | 1.0975E-10  | chr6  | 9456108   | 9456448   | + | 89   | 956096 NM_001032280.2  | 7020 AP-2 AP-2a    | protein-coding |
| TFAP2A   | 1.59141447 | 1.0975E-10  | chr6  | 9624280   | 9624434   | + | 49   | 768017 NM_001032280.2  | 7020 AP-2 AP-2a    | protein-coding |
| TFAP2B   | 2.72296298 | 6.6819E-24  | chr6  | 50935737  | 50936734  | + | 349  | 117509 NM_003221.3     | 7021 AP-2B AP2-f   | protein-coding |
| TFAP2B   | 2.72296298 | 6.6819E-24  | chr6  | 50952218  | 50952903  | + | 291  | 133834 NM_003221.3     | 7021 AP-2B AP2-f   | protein-coding |
| TFAP2B   | 2.72296298 | 6.6819E-24  | chr6  | 50826859  | 50827073  | + | 139  | 8240 NM_003221.3       | 7021 AP-2B AP2-f   | protein-coding |
| TFAP2B   | 2.72296298 | 6.6819E-24  | chr6  | 50970717  | 50971132  | + | 117  | 152198 NM_003221.3     | 7021 AP-2B AP2-f   | protein-coding |
| TFAP2B   | 2.72296298 | 6.6819E-24  | chr6  | 50192593  | 50192758  | + | 108  | -625017 XM_017011233.1 | 7021 AP-2B AP2-f   | protein-coding |
| TFAP2B   | 2.72296298 | 6.6819E-24  | chr6  | 50832959  | 50833241  | + | 77   | 14374 NM_003221.3      | 7021 AP-2B AP2-f   | protein-coding |
| TFAP2B   | 2.72296298 | 6.6819E-24  | chr6  | 50953564  | 50953760  | + | 59   | 134936 NM_003221.3     | 7021 AP-2B AP2-f   | protein-coding |
| TFAP2B   | 2.72296298 | 6.6819E-24  | chr6  | 50699197  | 50699408  | + | 48   | -118390 XM_017011233.1 | 7021 AP-2B AP2-f   | protein-coding |
| TFAP2B   | 2.72296298 | 6.6819E-24  | chr6  | 50902480  | 50902633  | + | 27   | 83830 NM_003221.3      | 7021 AP-2B AP2-f   | protein-coding |
| TG       | 2.76077718 | 8.1516E-26  | chr8  | 132881340 | 132881710 | + | 38   | 14565 NM_003235.4      | 7038 AITD3 TGN     | protein-coding |
| TG       | 2.76077718 | 8.1516E-26  | chr8  | 132893586 | 132893884 | + | 37   | 26775 NM_003235.4      | 7038 AITD3 TGN     | protein-coding |
| TGFB3    | 1.06654756 | 1.646E-07   | chr14 | 75981901  | 75982109  | + | 128  | 17 NM_003239.3         | 7043 ARVD ARVD     | protein-coding |
| TGFB3    | 0.96562041 | 0.00051832  | chr1  | 92087585  | 92087869  | + | 96   | -181725 NM_001195684.1 | 7049 BGCAN beta    | protein-coding |
| THBS3    | 0.5395641  | 0.02338816  | chr1  | 155244648 | 155244961 | + | 223  | -35624 XM_011509935.1  | 7059 TSP3          | protein-coding |
| TIMP3    | 0.67231284 | 0.00010009  | chr22 | 32780796  | 32780993  | + | 96   | -19922 NM_000362.4     | 7078 HSMRK222 I    | protein-coding |
| TK2      | 0.53132371 | 0.0057969   | chr16 | 66025461  | 66025810  | + | 242  | 524190 NM_001272050.1  | 7084 MTDP2S2 MT    | protein-coding |
| TK2      | 0.53132371 | 0.0057969   | chr16 | 65942044  | 65942496  | + | 223  | 607555 NM_001272050.1  | 7084 MTDP2S2 MT    | protein-coding |
| TK2      | 0.53132371 | 0.0057969   | chr16 | 66270219  | 66270734  | + | 186  | 279349 NM_001272050.1  | 7084 MTDP2S2 MT    | protein-coding |
| TK2      | 0.53132371 | 0.0057969   | chr16 | 66207190  | 66207573  | + | 150  | 342444 NM_001272050.1  | 7084 MTDP2S2 MT    | protein-coding |
| TK2      | 0.53132371 | 0.0057969   | chr16 | 66205712  | 66205909  | + | 19   | 344015 NM_001272050.1  | 7084 MTDP2S2 MT    | protein-coding |
| TLL2     | 1.38882503 | 4.2568E-06  | chr10 | 96473777  | 96474165  | + | 86   | 39955 NM_012465.3      | 7093 -             | protein-coding |
| TM9SF2   | 0.72730051 | 0.0002368   | chr13 | 99471330  | 99472310  | + | 1380 | -29554 NM_004800.2     | 9375 P76           | protein-coding |
| TM9SF2   | 0.72730051 | 0.0002368   | chr13 | 99437043  | 99437231  | + | 66   | -64237 NM_004800.2     | 9375 P76           | protein-coding |
| TM9SF2   | 0.72730051 | 0.0002368   | chr13 | 99501287  | 99501450  | + | 48   | -6 NM_004800.2         | 9375 P76           | protein-coding |
| TMEM125  | 0.85584115 | 0.00509415  | chr1  | 43274255  | 43274766  | + | 787  | 3701 XM_005270467.3    | 128218 -           | protein-coding |
| TMEM132B | 1.1434335  | 3.5395E-05  | chr12 | 126100731 | 126101459 | + | 683  | 463481 XM_011537854.2  | 114795 -           | protein-coding |
| TMEM132B | 1.1434335  | 3.5395E-05  | chr12 | 127074438 | 127075332 | + | 329  | 1437271 XM_011537854.2 | 114795 -           | protein-coding |
| TMEM132B | 1.1434335  | 3.5395E-05  | chr12 | 125971996 | 125972381 | + | 328  | 334574 XM_011537854.2  | 114795 -           | protein-coding |
| TMEM132B | 1.1434335  | 3.5395E-05  | chr12 | 127078984 | 127079513 | + | 232  | 1441634 XM_011537854.2 | 114795 -           | protein-coding |
| TMEM132B | 1.1434335  | 3.5395E-05  | chr12 | 127214108 | 127214657 | + | 204  | 1576768 XM_011537854.2 | 114795 -           | protein-coding |
| TMEM132B | 1.1434335  | 3.5395E-05  | chr12 | 126482616 | 126482773 | + | 66   | 845080 XM_011537854.2  | 114795 -           | protein-coding |
| TMEM132B | 1.1434335  | 3.5395E-05  | chr12 | 127108710 | 127108865 | + | 57   | 1471173 XM_011537854.2 | 114795 -           | protein-coding |
| TMEM132B | 1.1434335  | 3.5395E-05  | chr12 | 126966664 | 126966879 | + | 54   | 1329157 XM_011537854.2 | 114795 -           | protein-coding |
| TMEM132B | 1.1434335  | 3.5395E-05  | chr12 | 126338346 | 126338505 | + | 39   | 700811 XM_011537854.2  | 114795 -           | protein-coding |
| TMEM132B | 1.1434335  | 3.5395E-05  | chr12 | 126337987 | 126338221 | + | 37   | 700490 XM_011537854.2  | 114795 -           | protein-coding |
| TMEM132B | 1.1434335  | 3.5395E-05  | chr12 | 127150565 | 127150834 | + | 37   | 1513085 XM_011537854.2 | 114795 -           | protein-coding |
| TMEM132B | 1.1434335  | 3.5395E-05  | chr12 | 126506403 | 126506563 | + | 29   | 868869 XM_011537854.2  | 114795 -           | protein-coding |
| TMEM132B | 1.1434335  | 3.5395E-05  | chr12 | 126051576 | 126052115 | + | 25   | 414231 XM_011537854.2  | 114795 -           | protein-coding |
| TMEM200A | 0.68147039 | 0.02444932  | chr6  | 130600956 | 130601452 | + | 259  | 164087 NM_052913.2     | 114801 KIAA1913 T  | protein-coding |
| TMEM200A | 0.68147039 | 0.02444932  | chr6  | 130602243 | 130602697 | + | 101  | 165353 NM_052913.2     | 114801 KIAA1913 T  | protein-coding |
| TMEM200A | 0.68147039 | 0.02444932  | chr6  | 130431400 | 130431750 | + | 89   | -5542 NM_052913.2      | 114801 KIAA1913 T  | protein-coding |
| TMEM200A | 0.68147039 | 0.02444932  | chr6  | 130577292 | 130577447 | + | 29   | 140252 NM_052913.2     | 114801 KIAA1913 T  | protein-coding |
| TMEM220  | 0.80660552 | 0.00718969  | chr17 | 10773113  | 10773395  | + | 117  | -42925 NM_001004313.1  | 388335 -           | protein-coding |
| TMEM233  | 0.52499285 | 0.04545531  | chr12 | 119595827 | 119596771 | + | 1009 | 2840 NM_001136534.1    | 387890 DSPB2 IFITN | protein-coding |
| TMEM233  | 0.52499285 | 0.04545531  | chr12 | 119587860 | 119588354 | + | 369  | -4016 XM_005253880.3   | 387890 DSPB2 IFITN | protein-coding |
| TMEM233  | 0.52499285 | 0.04545531  | chr12 | 119625031 | 119625490 | + | 360  | 31801 NM_001136534.1   | 387890 DSPB2 IFITN | protein-coding |
| TMEM233  | 0.52499285 | 0.04545531  | chr12 | 119620450 | 119620977 | + | 309  | 27254 NM_001136534.1   | 387890 DSPB2 IFITN | protein-coding |
| TMEM233  | 0.52499285 | 0.04545531  | chr12 | 119589172 | 119589443 | + | 248  | -2816 XM_005253880.3   | 387890 DSPB2 IFITN | protein-coding |
| TMEM233  | 0.52499285 | 0.04545531  | chr12 | 119594322 | 119595038 | + | 66   | 1221 NM_001136534.1    | 387890 DSPB2 IFITN | protein-coding |
| TMEM92   | 1.50893249 | 0.3802E-07  | chr17 | 50300743  | 50301126  | + | 139  | 26507 NM_153229.2      | 162461 -           | protein-coding |
| TOX2     | 0.69084596 | 0.01947966  | chr20 | 43927262  | 43928555  | + | 1617 | 11766 NM_001098796.1   | 84969 C20orf100 G  | protein-coding |

|         |            |            |       |           |             |      |         |                |        |              |                |
|---------|------------|------------|-------|-----------|-------------|------|---------|----------------|--------|--------------|----------------|
| TOX2    | 0.69084596 | 0.01947966 | chr20 | 43925740  | 43926592 +  | 454  | 10024   | NM_001098796.1 | 84969  | C20orf100 G  | protein-coding |
| TOX2    | 0.69084596 | 0.01947966 | chr20 | 43862496  | 43862864 +  | 389  | -52172  | NM_001098797.1 | 84969  | C20orf100 G  | protein-coding |
| TOX2    | 0.69084596 | 0.01947966 | chr20 | 43939145  | 43939587 +  | 186  | -6530   | XM_006723884.1 | 84969  | C20orf100 G  | protein-coding |
| TOX2    | 0.69084596 | 0.01947966 | chr20 | 43926676  | 43926852 +  | 57   | 10622   | NM_001098796.1 | 84969  | C20orf100 G  | protein-coding |
| TOX2    | 0.69084596 | 0.01947966 | chr20 | 43964115  | 43964280 +  | 22   | -9170   | XM_017028109.1 | 84969  | C20orf100 G  | protein-coding |
| TPRG1   | 0.9812574  | 0.00049186 | chr3  | 189272352 | 189273242 + | 1088 | 57431   | XM_017006263.1 | 285386 | FAM79B       | protein-coding |
| TPRG1   | 0.9812574  | 0.00049186 | chr3  | 189300274 | 189300719 + | 254  | 85130   | XM_017006263.1 | 285386 | FAM79B       | protein-coding |
| TPRG1   | 0.9812574  | 0.00049186 | chr3  | 189292927 | 189293599 + | 183  | 77897   | XM_017006263.1 | 285386 | FAM79B       | protein-coding |
| TPRG1   | 0.9812574  | 0.00049186 | chr3  | 189173034 | 189173280 + | 106  | 1183    | NM_198485.3    | 285386 | FAM79B       | protein-coding |
| TPRG1   | 0.9812574  | 0.00049186 | chr3  | 189276644 | 189277401 + | 104  | 61656   | XM_017006263.1 | 285386 | FAM79B       | protein-coding |
| TPRG1   | 0.9812574  | 0.00049186 | chr3  | 189278017 | 189278192 + | 70   | 62738   | XM_017006263.1 | 285386 | FAM79B       | protein-coding |
| TPRG1   | 0.9812574  | 0.00049186 | chr3  | 188819994 | 188820169 + | 58   | -180693 | XM_017006261.1 | 285386 | FAM79B       | protein-coding |
| TPRG1   | 0.9812574  | 0.00049186 | chr3  | 189055933 | 189056088 + | 57   | -43421  | XM_017006257.1 | 285386 | FAM79B       | protein-coding |
| TPRG1   | 0.9812574  | 0.00049186 | chr3  | 188948126 | 188948278 + | 48   | -52572  | XM_017006261.1 | 285386 | FAM79B       | protein-coding |
| TPRG1   | 0.9812574  | 0.00049186 | chr3  | 189334788 | 189334975 + | 31   | 119515  | XM_017006263.1 | 285386 | FAM79B       | protein-coding |
| TPRG1   | 0.9812574  | 0.00049186 | chr3  | 188788772 | 188788989 + | 31   | -211894 | XM_017006261.1 | 285386 | FAM79B       | protein-coding |
| TPTE2   | 0.87269776 | 0.00028028 | chr13 | 19189307  | 19190421 +  | 1488 | 248611  | NM_001271850.1 | 93492  | TPIP         | protein-coding |
| TPTE2   | 0.87269776 | 0.00028028 | chr13 | 19266891  | 19267357 +  | 230  | 171351  | NM_001271850.1 | 93492  | TPIP         | protein-coding |
| TPTE2   | 0.87269776 | 0.00028028 | chr13 | 18980751  | 18981104 +  | 106  | 457548  | NM_001271850.1 | 93492  | TPIP         | protein-coding |
| TPTE2   | 0.87269776 | 0.00028028 | chr13 | 19264820  | 19264985 +  | 70   | 173573  | NM_001271850.1 | 93492  | TPIP         | protein-coding |
| TPTE2   | 0.87269776 | 0.00028028 | chr13 | 18978624  | 18978775 +  | 31   | 459776  | NM_001271850.1 | 93492  | TPIP         | protein-coding |
| TRIB1   | 1.82620645 | 3.2497E-17 | chr8  | 125521131 | 125522414 + | 2038 | 89563   | NM_001282985.1 | 10221  | C8FW GIG-2   | protein-coding |
| TRIB1   | 1.82620645 | 3.2497E-17 | chr8  | 125311152 | 125312019 + | 748  | -118736 | NM_025195.3    | 10221  | C8FW GIG-2   | protein-coding |
| TRIB1   | 1.82620645 | 3.2497E-17 | chr8  | 125644470 | 125644859 + | 229  | 212455  | NM_001282985.1 | 10221  | C8FW GIG-2   | protein-coding |
| TRIB1   | 1.82620645 | 3.2497E-17 | chr8  | 125429445 | 125429782 + | 96   | -708    | NM_025195.3    | 10221  | C8FW GIG-2   | protein-coding |
| TRIB1   | 1.82620645 | 3.2497E-17 | chr8  | 125430096 | 125430413 + | 96   | -67     | NM_025195.3    | 10221  | C8FW GIG-2   | protein-coding |
| TRIB1   | 1.82620645 | 3.2497E-17 | chr8  | 125895697 | 125896014 + | 56   | 463646  | NM_001282985.1 | 10221  | C8FW GIG-2   | protein-coding |
| TRIB1   | 1.82620645 | 3.2497E-17 | chr8  | 125309739 | 125309949 + | 53   | -120477 | NM_025195.3    | 10221  | C8FW GIG-2   | protein-coding |
| TRIB1   | 1.82620645 | 3.2497E-17 | chr8  | 125525453 | 125525604 + | 39   | 93319   | NM_001282985.1 | 10221  | C8FW GIG-2   | protein-coding |
| TRIM2   | 2.15221574 | 3.9508E-16 | chr4  | 153074927 | 153075230 + | 144  | -77203  | XM_017007952.1 | 23321  | CMT2R RNF    | protein-coding |
| TRIM2   | 2.15221574 | 3.9508E-16 | chr4  | 153221916 | 153222686 + | 128  | 17839   | XM_017007955.1 | 23321  | CMT2R RNF    | protein-coding |
| TRIM2   | 2.15221574 | 3.9508E-16 | chr4  | 153079906 | 153080277 + | 94   | -72190  | XM_017007952.1 | 23321  | CMT2R RNF    | protein-coding |
| TRIM2   | 2.15221574 | 3.9508E-16 | chr4  | 153260936 | 153261117 + | 22   | 3647    | XM_017007947.1 | 23321  | CMT2R RNF    | protein-coding |
| TSHZ3   | 1.23015342 | 8.3198E-06 | chr19 | 31004267  | 31005135 +  | 1326 | 344583  | NM_020856.2    | 57616  | TSH3 ZNF53   | protein-coding |
| TSHZ3   | 1.23015342 | 8.3198E-06 | chr19 | 31742333  | 31742960 +  | 544  | -393362 | NM_020856.2    | 57616  | TSH3 ZNF53   | protein-coding |
| TSHZ3   | 1.23015342 | 8.3198E-06 | chr19 | 31340205  | 31340479 +  | 92   | 8942    | NM_020856.2    | 57616  | TSH3 ZNF53   | protein-coding |
| TSHZ3   | 1.23015342 | 8.3198E-06 | chr19 | 31408536  | 31409232 +  | 80   | -59600  | NM_020856.2    | 57616  | TSH3 ZNF53   | protein-coding |
| TSHZ3   | 1.23015342 | 8.3198E-06 | chr19 | 31224207  | 31224432 +  | 57   | 124965  | NM_020856.2    | 57616  | TSH3 ZNF53   | protein-coding |
| TSHZ3   | 1.23015342 | 8.3198E-06 | chr19 | 31013580  | 31013943 +  | 57   | 335523  | NM_020856.2    | 57616  | TSH3 ZNF53   | protein-coding |
| TSKU    | 0.58428732 | 0.00051466 | chr11 | 76806870  | 76807644 +  | 57   | 15505   | NM_001318477.1 | 25987  | E2IG4 LRRCL  | protein-coding |
| TSPAN11 | 2.47795511 | 7.3636E-35 | chr12 | 30869788  | 30870278 +  | 274  | -56400  | XM_011520679.2 | 441631 | VSSW1971     | protein-coding |
| TSPAN11 | 2.47795511 | 7.3636E-35 | chr12 | 30902205  | 30902468 +  | 53   | -24097  | XM_011520679.2 | 441631 | VSSW1971     | protein-coding |
| TSPEAR  | 0.96991841 | 0.00027728 | chr21 | 44741418  | 44742063 +  | 248  | -30160  | NM_144991.2    | 54084  | C21orf29 DF  | protein-coding |
| TSPEAR  | 0.96991841 | 0.00027728 | chr21 | 44752602  | 44752883 +  | 139  | -41162  | NM_144991.2    | 54084  | C21orf29 DF  | protein-coding |
| TSPEAR  | 0.96991841 | 0.00027728 | chr21 | 44755231  | 44755513 +  | 96   | -43792  | NM_144991.2    | 54084  | C21orf29 DF  | protein-coding |
| UBE2E3  | 0.76585575 | 0.00366036 | chr2  | 181021084 | 181022106 + | 559  | 40471   | NM_001278554.1 | 10477  | UBCH9 UbcI   | protein-coding |
| UBE2E3  | 0.76585575 | 0.00366036 | chr2  | 180722968 | 180723253 + | 45   | -257271 | XM_017003166.1 | 10477  | UBCH9 UbcI   | protein-coding |
| UGT3A2  | 0.57639434 | 0.00026789 | chr5  | 36068484  | 36069692 +  | 1452 | -2167   | NM_174914.3    | 167127 | -            | protein-coding |
| UGT3A2  | 0.57639434 | 0.00026789 | chr5  | 36067765  | 36068293 +  | 57   | -1108   | NM_174914.3    | 167127 | -            | protein-coding |
| UGT3A2  | 0.57639434 | 0.00026789 | chr5  | 36066927  | 36067641 +  | 45   | -363    | NM_174914.3    | 167127 | -            | protein-coding |
| UGT3A2  | 0.57639434 | 0.00026789 | chr5  | 36073655  | 36073848 +  | 28   | -2393   | XM_017009150.1 | 167127 | -            | protein-coding |
| UGT3A2  | 0.57639434 | 0.00026789 | chr5  | 36079187  | 36079347 +  | 23   | -7909   | XM_017009150.1 | 167127 | -            | protein-coding |
| UGT3A2  | 0.57639434 | 0.00026789 | chr5  | 36060648  | 36060827 +  | 23   | 6145    | XM_011513988.2 | 167127 | -            | protein-coding |
| UNC93B1 | 1.23347619 | 1.4128E-05 | chr11 | 67826613  | 67826838 +  | 22   | 176379  | XM_011545290.1 | 81622  | IIAE1 UNC93  | protein-coding |
| USP13   | 0.84593185 | 3.3921E-07 | chr3  | 179745186 | 179746081 + | 1241 | 44542   | XM_017007427.1 | 8975   | ISOT3 IsoT-2 | protein-coding |
| USP13   | 0.84593185 | 3.3921E-07 | chr3  | 179767952 | 179768319 + | 172  | 67044   | XM_017007427.1 | 8975   | ISOT3 IsoT-2 | protein-coding |
| USP13   | 0.84593185 | 3.3921E-07 | chr3  | 179769938 | 179770217 + | 96   | 68986   | XM_017007427.1 | 8975   | ISOT3 IsoT-2 | protein-coding |
| USP13   | 0.84593185 | 3.3921E-07 | chr3  | 179649708 | 179649909 + | 70   | -3337   | NM_003940.2    | 8975   | ISOT3 IsoT-2 | protein-coding |
| USP13   | 0.84593185 | 3.3921E-07 | chr3  | 179771888 | 179772153 + | 57   | 70929   | XM_017007427.1 | 8975   | ISOT3 IsoT-2 | protein-coding |
| USP13   | 0.84593185 | 3.3921E-07 | chr3  | 179709307 | 179709494 + | 57   | 8309    | XM_017007427.1 | 8975   | ISOT3 IsoT-2 | protein-coding |
| VGFB    | 0.62990692 | 0.0337363  | chr7  | 101165526 | 101165718 + | 86   | -51     | NM_003378.3    | 7425   | SCG7 SgVII   | protein-coding |
| WDR66   | 0.69413368 | 0.00390902 | chr12 | 121924588 | 121925047 + | 139  | 6260    | NM_144668.5    | 144406 | CFAP251 Ca   | protein-coding |
| WIPF1   | 1.06927527 | 0.00026469 | chr2  | 174593574 | 174593940 + | 86   | 4091    | XM_011511780.2 | 7456   | PRPL-2 WAS   | protein-coding |
| WNT11   | 2.77740454 | 1.3564E-26 | chr11 | 76235358  | 76236247 +  | 106  | -24960  | XM_011545239.2 | 7481   | HWNT11       | protein-coding |
| WSCD1   | 1.58453557 | 1.2088E-09 | chr17 | 6257308   | 6257682 +   | 61   | 179545  | XM_005256572.1 | 23302  | -            | protein-coding |
| ZBTB18  | 0.67782074 | 0.02098827 | chr1  | 243969828 | 243970434 + | 304  | -78808  | NM_001278196.1 | 10472  | C2H2-171 M   | protein-coding |
| ZCCHC24 | 0.91829902 | 0.00145566 | chr10 | 79446089  | 79446240 +  | 39   | -537    | NM_153367.3    | 219654 | C10orf56 Z3  | protein-coding |
| ZCWPW1  | 0.59885995 | 0.04611088 | chr7  | 100428451 | 100429664 + | 89   | 182     | XM_005250479.2 | 55063  | ZCW1         | protein-coding |
| ZFP36L1 | 0.54450898 | 0.01298399 | chr14 | 68684782  | 68685205 +  | 318  | 108921  | NM_001244698.1 | 677    | BRF1 Berg3   | protein-coding |
| ZFP36L1 | 0.54450898 | 0.01298399 | chr14 | 68682751  | 68683387 +  | 314  | 110845  | NM_001244698.1 | 677    | BRF1 Berg3   | protein-coding |
| ZFP36L1 | 0.54450898 | 0.01298399 | chr14 | 68548230  | 68548540 +  | 128  | 245529  | NM_001244698.1 | 677    | BRF1 Berg3   | protein-coding |
| ZFP36L1 | 0.54450898 | 0.01298399 | chr14 | 68793245  | 68793565 +  | 128  | 509     | NM_001244698.1 | 677    | BRF1 Berg3   | protein-coding |
| ZFP36L1 | 0.54450898 | 0.01298399 | chr14 | 68749543  | 68749753 +  | 57   | 44266   | NM_001244698.1 | 677    | BRF1 Berg3   | protein-coding |
| ZFYVE1  | 1.34679841 | 7.7839E-12 | chr14 | 73015112  | 73015307 +  | 128  | 12003   | NM_021260.3    | 53349  | DFCP1 PPP1   | protein-coding |

|               |            |            |       |          |          |   |     |        |                |       |   |                |
|---------------|------------|------------|-------|----------|----------|---|-----|--------|----------------|-------|---|----------------|
| <b>ZMAT4</b>  | 0.60775331 | 0.00613755 | chr8  | 40936285 | 40937016 | + | 811 | -38822 | XM_017013836.1 | 79698 | - | protein-coding |
| <b>ZMAT4</b>  | 0.60775331 | 0.00613755 | chr8  | 40947230 | 40947639 | + | 242 | -49606 | XM_017013836.1 | 79698 | - | protein-coding |
| <b>ZMAT4</b>  | 0.60775331 | 0.00613755 | chr8  | 40493998 | 40494360 | + | 80  | 266857 | XM_017013840.1 | 79698 | - | protein-coding |
| <b>ZMAT4</b>  | 0.60775331 | 0.00613755 | chr8  | 40932853 | 40933066 | + | 76  | -35131 | XM_017013836.1 | 79698 | - | protein-coding |
| <b>ZMAT4</b>  | 0.60775331 | 0.00613755 | chr8  | 40792321 | 40792635 | + | 66  | -31442 | XM_017013840.1 | 79698 | - | protein-coding |
| <b>ZNF528</b> | 0.6106768  | 0.04500121 | chr19 | 52397390 | 52398214 | + | 605 | -66    | NM_032423.2    | 84436 | - | protein-coding |
| <b>ZNF536</b> | 0.67189675 | 0.0265609  | chr19 | 30779926 | 30780287 | + | 397 | 264072 | XM_017027543.1 | 9745  | - | protein-coding |
| <b>ZNF536</b> | 0.67189675 | 0.0265609  | chr19 | 30466604 | 30466879 | + | 86  | -49293 | XM_017027543.1 | 9745  | - | protein-coding |
| <b>ZNF536</b> | 0.67189675 | 0.0265609  | chr19 | 30450021 | 30450293 | + | 23  | -65877 | XM_017027543.1 | 9745  | - | protein-coding |

**Supplementary Table 2**

| Name         | sequence               | Note                      |
|--------------|------------------------|---------------------------|
| sgNEG        | GAAGATGGGCGGGAGTCTTC   |                           |
| sgNEG_2      | AGTCGCTTCTCGATTATGGG   |                           |
| sgCDK1       | ACACAATCCCCTGTAGGATT   |                           |
| sgETV6_1     | AACGGACTGGCTCGACTGTG   | target DBD domain of ETV6 |
| sgETV6_2     | TCGATAGCGAAAGTCCTCTT   | target SAM domain of ETV6 |
| sgEWS-FLI1_1 | AGCGCCTGGCCACCTCATCG   | target DBD domain of FLI1 |
| sgEWS-FLI1_2 | ACAGCTGGCGTTGGCGCTGT   | target DBD domain of FLI1 |
| sgSOX11_1    | CGCGGGCGACGACTACGTGC   |                           |
| sgSOX11_2    | GATCTTCCTGCGTTCGATCT   |                           |
| sgNTRK1_1    | CTCTGTACCCCCGATCTTGA   |                           |
| sgNTRK1_2    | CGGCAGCCAATGAGACCGTG   |                           |
| sgNT         | GGACGAATCGACAAATTGTG   | Non-targeting control     |
| sgCDKN1A_P   | GAACGCAGGCGAGGGACTGG   |                           |
| sgTP73_P     | GTGGACGCGGCCAGCTGGAG   |                           |
| sgSOX11_P_1  | GTGCAAAGCAGCCCGGAGGG   |                           |
| sgSOX11_P_2  | GGGGCTGCTTTGCAAAGATG   |                           |
| sgNTRK1_P_1  | GAGGCGGATCCTCGGGGAGA   |                           |
| sgNTRK1_P_2  | GGGGCCCCTAACAGGGGAGG   |                           |
| hGAPDH_RT F  | GTCTCCTCTGACTTCAACAGCG |                           |
| hGAPDH_RT R  | ACCACCCTGTTGCTGTAGCCAA |                           |
| NTRK1_RT F   | AACCTCACCATCGTGAAGAGT  |                           |
| NTRK1_RT R   | TGAAGGAGAGATTCAGGCGAC  | qPCR primers              |
| SOX11_RT_F   | AGCAAGAAATGCGGCAAGC    |                           |
| SOX11_RT_R   | ATCCAGAAACACGCACTTGAC  |                           |

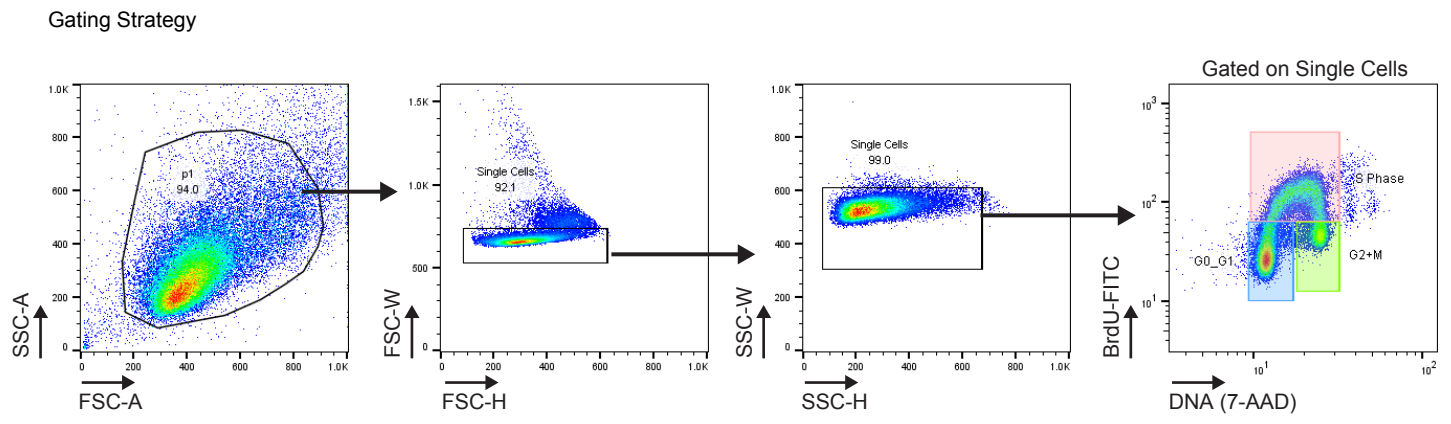

Supplementary Fig. 1. The gating strategy for the BrdU FACS assay in Fig. 2a.
